# Supplementary material for: Copper cluster complex-catalyzed C–S bond formation
Source: Royal Society of Chemistry journal article supplement (doi:10.1039/d4cy00968a), 2024-01-01

## Supporting Information

### Copper Cluster Complex Catalyzed C-S Bond Formation

Nien-Chi Chang Liao,<sup>a</sup> R. Sidick Basha,<sup>a</sup> Bo-Hao Shih,<sup>a</sup> Chia-Chun Liu,<sup>a</sup> Miao-Han Wang,<sup>a</sup> Po-Heng Lin,<sup>\*a</sup> and Chin-Fa Lee,<sup>\*a,b,c</sup>

<sup>a</sup>Department of Chemistry, National Chung Hsing University, Taichung, Taiwan 402, R.O.C.

<sup>b</sup>*i*-Center for Advanced Science and Technology (*i*CAST), National Chung Hsing University, Taichung, Taiwan 402, R.O.C.

<sup>c</sup>Innovation and Development Center of Sustainable Agriculture (IDCSA), National Chung Hsing University, Taichung, Taiwan 402, R.O.C.

Email: [cfalee@dragon.nchu.edu.tw](mailto:cfalee@dragon.nchu.edu.tw) Email: [poheng@dragon.nchu.edu.tw](mailto:poheng@dragon.nchu.edu.tw)

#### Table of Contents

|                                                                                   |     |
|-----------------------------------------------------------------------------------|-----|
| 1. Crystallographic Data of Complexes <b>A</b> , <b>B</b> and <b>C</b> .....      | S2  |
| 2. Summary of SHAPE analysis for complexes <b>A</b> , <b>B</b> and <b>C</b> ..... | S10 |
| 3. NMR measurement.....                                                           | S12 |
| 4. <sup>1</sup> H & <sup>13</sup> C NMR Spectra.....                              | S13 |

**Table S1.** Crystallographic Data of Complexes **A**, **B** and **C**.

| <b>Complex</b>                             | <b>A</b>                                                                        | <b>B</b>                                                                       | <b>C</b>                                                                        |
|--------------------------------------------|---------------------------------------------------------------------------------|--------------------------------------------------------------------------------|---------------------------------------------------------------------------------|
| Formula                                    | C <sub>80</sub> H <sub>84</sub> Cu <sub>8</sub> N <sub>24</sub> O <sub>36</sub> | C <sub>64</sub> H <sub>58</sub> Cu <sub>4</sub> N <sub>8</sub> O <sub>14</sub> | C <sub>46</sub> H <sub>62</sub> Cu <sub>4</sub> N <sub>14</sub> O <sub>22</sub> |
| CCDC no.                                   | 2013079                                                                         | 2013080                                                                        | 2013078                                                                         |
| Formula weight                             | 2466.03                                                                         | 1417.38                                                                        | 1417.30                                                                         |
| Temp (K)                                   | 200(2) K                                                                        | 150(2) K                                                                       | 150(2) K                                                                        |
| Crystal system                             | monoclinic                                                                      | monoclinic                                                                     | triclinic                                                                       |
| Space group                                | C 2/c                                                                           | I 2/a                                                                          | P-1                                                                             |
| a (Å)                                      | 23.249(4)                                                                       | 24.8301(13)                                                                    | 6.9977(3)                                                                       |
| b (Å)                                      | 24.663(4)                                                                       | 11.1779(6)                                                                     | 13.6034(8)                                                                      |
| c (Å)                                      | 19.015(3)                                                                       | 25.5838(10)                                                                    | 16.4938(9)                                                                      |
| $\alpha$ (deg)                             | 90                                                                              | 90                                                                             | 111.441(5)                                                                      |
| $\beta$ (deg)                              | 114.638(3)                                                                      | 117.139(3)                                                                     | 91.672(4)                                                                       |
| $\gamma$ (deg)                             | 90                                                                              | 90                                                                             | 104.326(5)                                                                      |
| V(Å <sup>3</sup> )                         | 9910(3)                                                                         | 6319.0(6)                                                                      | 1403.47(14)                                                                     |
| Z                                          | 4                                                                               | 4                                                                              | 1                                                                               |
| $D_{\text{calc}}$ (g/cm <sup>3</sup> )     | 1.653                                                                           | 1.490                                                                          | 1.677                                                                           |
| $\mu$ (Mo K $\alpha$ ) (mm <sup>-1</sup> ) | 1.778                                                                           | 1.399                                                                          | 1.587                                                                           |
| $F(000)$                                   | 5008.0                                                                          | 2904.0                                                                         | 728.0                                                                           |
| N <sub>ref</sub> , N <sub>par</sub>        | 8781, 629                                                                       | 6224, 409                                                                      | 5521, 376                                                                       |
| $R1 [I > 2\sigma(I)]$                      | 0.0717                                                                          | 0.0530                                                                         | 0.0742                                                                          |
| wR2 [ $I > 2\sigma(I)$ ]                   | 0.2091                                                                          | 0.2183                                                                         | 0.2996                                                                          |
| S                                          | 0.987                                                                           | 1.027                                                                          | 1.063                                                                           |

**Table S2.** Selected angle and bond lengths (Å) for complexes **A**

|         |           |         |           |           |           |
|---------|-----------|---------|-----------|-----------|-----------|
| C1-O1   | 1.293(10) | C21-C22 | 1.382(12) | N4-Cu2    | 1.937(6)  |
| C1-C7   | 1.372(12) | C22-C23 | 1.375(12) | N5-N6     | 1.382(9)  |
| C1-C2   | 1.453(11) | C23-C24 | 1.432(12) | N5-Cu3    | 1.942(6)  |
| C2-O2   | 1.362(10) | C24-C25 | 1.412(11) | N6-Cu4    | 1.982(6)  |
| C2-C4   | 1.367(12) | C25-N5  | 1.304(10) | N7-N8     | 1.408(8)  |
| C3-O2   | 1.417(9)  | C26-O8  | 1.272(9)  | N8-Cu4    | 1.939(8)  |
| C4-C5   | 1.393(12) | C26-N6  | 1.337(11) | N11-O17   | 1.12(4)   |
| C5-C6   | 1.330(11) | C26-N7  | 1.353(10) | N11-O16   | 1.32(2)   |
| C6-C7   | 1.420(12) | C27-N8  | 1.301(10) | N11-O18   | 1.33(7)   |
| C7-C8   | 1.435(10) | C27-C28 | 1.429(11) | N11'-O16' | 1.08(5)   |
| C8-N1   | 1.300(9)  | C28-C29 | 1.401(12) | N11'-O18' | 1.26(4)   |
| C9-O3   | 1.277(8)  | C28-C34 | 1.403(12) | N11'-O17' | 1.37(3)   |
| C9-N3   | 1.330(9)  | C29-C30 | 1.380(12) | N12-O14   | 1.196(9)  |
| C9-N2   | 1.360(9)  | C30-C31 | 1.390(13) | N12-O13   | 1.236(9)  |
| C10-N4  | 1.302(9)  | C31-C32 | 1.346(13) | N12-O15   | 1.244(9)  |
| C10-C11 | 1.447(10) | C32-O9  | 1.387(11) | O1-Cu1    | 1.874(5)  |
| C11-C17 | 1.391(10) | C32-C34 | 1.441(12) | O3-Cu2    | 1.937(5)  |
| C11-C12 | 1.415(10) | C33-O9  | 1.426(9)  | O4-Cu2    | 1.938(5)  |
| C12-C13 | 1.342(11) | C34-O10 | 1.291(10) | O4-Cu3    | 1.997(4)  |
| C13-C14 | 1.401(11) | C35-O11 | 1.253(10) | O5-Cu3    | 2.270(5)  |
| C14-C15 | 1.355(10) | C35-N9  | 1.296(11) | O6-Cu3    | 1.932(5)  |
| C15-O5  | 1.370(9)  | C36-N9  | 1.429(11) | O6-Cu2    | 1.982(5)  |
| C15-C17 | 1.438(11) | C37-N9  | 1.449(13) | O7-Cu2    | 2.230(6)  |
| C16-O5  | 1.398(10) | C38-N10 | 1.31(2)   | O8-Cu3    | 1.961(5)  |
| C17-O4  | 1.354(8)  | C38-O12 | 1.427(19) | O10-Cu4   | 1.881(6)  |
| C18-O6  | 1.377(9)  | C39-N10 | 1.366(13) | O11-Cu1   | 1.969(6)  |
| C18-C19 | 1.392(11) | C40-N10 | 1.439(15) | O12-Cu4   | 2.175(11) |
| C18-C24 | 1.396(10) | N1-N2   | 1.414(8)  | O16-Cu4   | 2.028(14) |
| C19-O7  | 1.361(9)  | N1-Cu1  | 1.921(6)  | O16'-Cu4  | 2.20(2)   |
| C19-C21 | 1.387(12) | N3-N4   | 1.386(8)  | Cu2-O6    | 1.982(5)  |
| C20-O7  | 1.420(9)  | N3-Cu1  | 1.980(6)  | Cu2-O7    | 2.230(6)  |

---

|              |           |              |           |                |           |
|--------------|-----------|--------------|-----------|----------------|-----------|
| ∠C1-C7-C6    | 120.5(9)  | ∠C26-N6-Cu4  | 119.4(9)  | ∠N1-C8-C7      | 126.8(6)  |
| ∠C1-C7-C8    | 114.4(8)  | ∠C26-N6-N5   | 120.2(9)  | ∠N1-Cu1-N3     | 112.7(5)  |
| ∠C1-O1-Cu1   | 116.3(7)  | ∠C26-N7-N8   | 117.0(9)  | ∠N1-Cu1-O11    | 119.4(4)  |
| ∠C10-N4-Cu2  | 123.9(7)  | ∠C27-N8-Cu4  | 117.8(9)  | ∠N10-C38-O12   | 113.9(2)  |
| ∠C10-N4-N3   | 124.1(7)  | ∠C27-N8-N7   | 116.9(8)  | ∠N11-O16-Cu4   | 111.8(5)  |
| ∠C11-C17-C15 | 121.9(8)  | ∠C28-C34-C32 | 119.4(8)  | ∠N11'-O16'-Cu4 | 129.8(5)  |
| ∠C12-C11-C10 | 124.2(7)  | ∠C29-C28-C27 | 122.8(10) | ∠N2-N1-Cu1     | 127.2(5)  |
| ∠C12-C13-C14 | 119.6(7)  | ∠C29-C30-C31 | 113.1(9)  | ∠N3-N4-Cu2     | 108.8(6)  |
| ∠C13-C12-C11 | 121.2(8)  | ∠C29-C28-C34 | 123.6(9)  | ∠N3-C9-N2      | 114.6(6)  |
| ∠C14-C15-C17 | 119.1(8)  | ∠C30-C29-C28 | 121.2(8)  | ∠N4-C10-C11    | 134.8(6)  |
| ∠C14-C15-O5  | 117.6(7)  | ∠C31-C32-C34 | 115.2(9)  | ∠N4-N3-Cu1     | 127.8(6)  |
| ∠C15-C14-C13 | 118.3(6)  | ∠C31-C32-O9  | 125.9(16) | ∠N4-Cu2-O4     | 114.9(5)  |
| ∠C15-O5-C16  | 118.2(7)  | ∠C32-C31-C30 | 125.0(8)  | ∠N4-Cu2-O6     | 128.2(6)  |
| ∠C15-O5-Cu3  | 120.6(7)  | ∠C32-O9-C33  | 121.9(9)  | ∠N4-Cu2-O7     | 118.9(12) |
| ∠C16-O5-Cu3  | 113.7(6)  | ∠C34-C28-C27 | 107.3(15) | ∠N5-C25-C24    | 107(3)    |
| ∠C17-C11-C10 | 120.4(8)  | ∠C34-O10-Cu4 | 126.7(13) | ∠N5-N6-Cu4     | 120.7(18) |
| ∠C17-C11-C12 | 116.6(8)  | ∠C35-N9-C36  | 119.4(8)  | ∠N5-Cu3-O4     | 90.7(3)   |
| ∠C17-O4-Cu2  | 117.9(7)  | ∠C35-N9-C37  | 120.9(8)  | ∠N5-Cu3-O5     | 112.6(6)  |
| ∠C17-O4-Cu3  | 120.4(9)  | ∠C35-O11-Cu1 | 126.0(8)  | ∠N5-Cu3-O8     | 118.2(7)  |
| ∠C18-C24-C23 | 117.2(8)  | ∠C36-N9-C37  | 120.0(9)  | ∠N6-N5-Cu3     | 116.7(7)  |
| ∠C18-C24-C25 | 116.8(8)  | ∠C38-N10-C39 | 123.1(8)  | ∠N6-C26-N7     | 116.4(7)  |
| ∠C18-O6-Cu2  | 115.7(6)  | ∠C38-N10-C40 | 121.9(8)  | ∠N6-Cu4-O12    | 125.1(7)  |
| ∠C18-O6-Cu3  | 123.1(8)  | ∠C38-O12-Cu4 | 117.2(8)  | ∠N6-Cu4-O16    | 81.1(3)   |
| ∠C19-O7-C20  | 118.9(9)  | ∠C39-N10-C40 | 129.0(6)  | ∠N6-Cu4-O16'   | 171.0(3)  |
| ∠C19-C18-C24 | 115.8(8)  | ∠C4-C2-C1    | 114.6(5)  | ∠N7-N8-Cu4     | 99.2(2)   |
| ∠C19-O7-Cu2  | 117.6(7)  | ∠C5-C6-C7    | 113.2(5)  | ∠N8-C27-C28    | 120.8(6)  |
| ∠C2-O2-C3    | 121.5(8)  | ∠C6-C5-C4    | 136.8(5)  | ∠N8-Cu4-N6     | 82.4(2)   |
| ∠C2-C4-C5    | 120.5(8)  | ∠C6-C7-C8    | 129.4(6)  | ∠N8-Cu4-O12    | 109.9(6)  |
| ∠C20-O7-Cu2  | 123.0(8)  | ∠C7-C1-C2    | 121.0(6)  | ∠N8-Cu4-O16    | 91.4(3)   |
| ∠C21-C19-C18 | 124.2(7)  | ∠C8-N1-Cu1   | 126.2(5)  | ∠N8-Cu4-O16'   | 110.6(7)  |
| ∠C22-C21-C19 | 126.5(8)  | ∠C8-N1-N2    | 112.8(5)  | ∠O1-C1-C2      | 125.0(8)  |
| ∠C22-C23-C24 | 117.5(9)  | ∠C9-N3-Cu1   | 109.0(5)  | ∠O1-C1-C7      | 79.2(3)   |
| ∠C23-C22-C21 | 123.1(8)  | ∠C9-O3-Cu2   | 124.8(5)  | ∠O1-Cu1-N1     | 168.1(3)  |
| ∠C25-C24-C23 | 123.0(8)  | ∠C9-N2-N1    | 117.3(5)  | ∠O1-Cu1-N3     | 120.4(7)  |
| ∠C25-N5-Cu3  | 121.3(10) | ∠C9-N3-N4    | 113.7(3)  | ∠O1-Cu1-O11    | 116.6(7)  |
| ∠C25-N5-N6   | 125.3(8)  | ∠Cu2-O4-Cu3  | 110.3(5)  | ∠O10-C34-C28   | 118.4(9)  |
| ∠C26-O8-Cu3  | 117.4(7)  | ∠Cu3-O6-Cu2  | 121.1(5)  | ∠O10-C34-C32   | 117.2(8)  |

---

---

|                 |           |                 |           |             |           |
|-----------------|-----------|-----------------|-----------|-------------|-----------|
| ∠O10-Cu4-N6     | 91.9(3)   | ∠O17-N11-O16    | 130(6)    | ∠O5-C15-C17 | 125.6(8)  |
| ∠O10-Cu4-N8     | 112.7(7)  | ∠O17-N11-O18    | 96.2(6)   | ∠O6-C18-C19 | 109.7(2)  |
| ∠O10-Cu4-O12    | 124.4(9)  | ∠O18'-N11'-O17' | 96.5(8)   | ∠O6-C18-C24 | 75.88(19) |
| ∠O10-Cu4-O16    | 178.9(3)  | ∠O2-C2-C1       | 92.6(6)   | ∠O6-Cu3-N5  | 101.7(2)  |
| ∠O10-Cu4-O16'   | 89.0(2)   | ∠O2-C2-C4       | 99.2(8)   | ∠O6-Cu3-O4  | 90.2(2)   |
| ∠O11-Cu1-N3     | 114.7(19) | ∠O3-C9-N2       | 44.4(8)   | ∠O6-Cu3-O5  | 173.8(2)  |
| ∠O11-C35-N9     | 99.6(4)   | ∠O3-C9-N3       | 116.3(18) | ∠O6-Cu2-O7  | 94.3(2)   |
| ∠O12-Cu4-O16'   | 164.3(4)  | ∠O3-Cu2-N4      | 113(3)    | ∠O6-Cu3-O8  | 90.2(2)   |
| ∠O13-N12-O15    | 86.8(4)   | ∠O3-Cu2-O4      | 106(3)    | ∠O7-C19-C18 | 107.7(2)  |
| ∠O14-N12-O13    | 55.2(5)   | ∠O3-Cu2-O6      | 124(3)    | ∠O7-C19-C21 | 92.4(2)   |
| ∠O14-N12-O15    | 121.5(10) | ∠O3-Cu2-O7      | 129(3)    | ∠O8-C26-N6  | 98.0(2)   |
| ∠O16-Cu4-O12    | 119.0(9)  | ∠O4-C17-C11     | 92.3(2)   | ∠O8-C26-N7  | 77.5(2)   |
| ∠O16-Cu4-O16'   | 119.5(10) | ∠O4-C17-C15     | 169.4(2)  | ∠O8-Cu3-O4  | 82.2(3)   |
| ∠O16-N11-O18    | 97.1(4)   | ∠O4-Cu3-O5      | 174.1(2)  | ∠O8-Cu3-O5  | 167.9(2)  |
| ∠O16'-N11'-O17' | 140.5(4)  | ∠O4-Cu2-O6      | 89.3(2)   | ∠O9-C32-C34 | 124.0(9)  |
| ∠O16'-N11'-O18' | 94.8(4)   | ∠O4-Cu2-O7      | 96.1(2)   |             |           |

---

**Table S3.** Selected angle and bond lengths (Å) for complexes **B**

|         |          |         |           |        |           |
|---------|----------|---------|-----------|--------|-----------|
| C10-C11 | 1.395(6) | C25-C29 | 1.379(5)  | Cu2-O3 | 2.296(2)  |
| C10-C12 | 1.379(6) | C28-C30 | 1.376(5)  | Cu2-O5 | 2.004(2)  |
| C12-C13 | 1.386(6) | C29-C30 | 1.401(6)  | Cu2-O6 | 1.965(2)  |
| C15-C16 | 1.450(5) | C2-C4   | 1.395(6)  | N1-C23 | 1.290(5)  |
| C16-C17 | 1.411(5) | C3-C5   | 1.383(6)  | N1-N2  | 1.405(4)  |
| C16-C20 | 1.412(5) | C41-C42 | 1.473(10) | N2-C35 | 1.327(5)  |
| C17-C16 | 1.411(5) | C4-C6   | 1.366(7)  | N3-C15 | 1.286(4)  |
| C17-C21 | 1.413(5) | C5-C6   | 1.392(7)  | N3-N4  | 1.389(4)  |
| C18-C19 | 1.395(5) | C8-C13  | 1.396(5)  | N4-C14 | 1.335(5)  |
| C18-C21 | 1.377(5) | C8-C14  | 1.488(5)  | O1-C35 | 1.278(4)  |
| C19-C20 | 1.378(5) | C8-C9   | 1.402(5)  | O2-C14 | 1.278(4)  |
| C1-C2   | 1.365(6) | C9-C11  | 1.389(6)  | O3-C21 | 1.374(4)  |
| C1-C3   | 1.412(6) | Cu1-N3  | 1.918(3)  | O3-C22 | 1.421(4)  |
| C1-C35  | 1.491(5) | Cu1-O2  | 1.936(2)  | O4-C25 | 1.370(4)  |
| C21-C18 | 1.377(5) | Cu1-O4  | 2.280(2)  | O4-C26 | 1.429(4)  |
| C23-C24 | 1.441(5) | Cu1-O5  | 1.955(2)  | O5-C17 | 1.350(4)  |
| C24-C27 | 1.392(5) | Cu1-O6  | 1.989(2)  | O5-Cu1 | 1.955(2)  |
| C24-C28 | 1.412(5) | Cu2-N1  | 1.917(3)  | O6-C27 | 1.348(4)  |
| C25-C27 | 1.428(4) | Cu2-O1  | 1.936(2)  | O7-C41 | 1.430(10) |

---

|              |          |              |            |             |            |
|--------------|----------|--------------|------------|-------------|------------|
| ∠C5-C3-C1    | 120.0(5) | ∠C29-C25-C27 | 121.1(3)   | ∠C35-O1-Cu2 | 110.6(2)   |
| ∠N2-C35-C1   | 116.2(3) | ∠O4-C25-C27  | 115.3(3)   | ∠Cu1-O5-Cu2 | 112.84(11) |
| ∠O1-C35-C1   | 119.3(3) | ∠C27-C24-C28 | 119.8(3)   | ∠N2-N1-Cu2  | 114.4(2)   |
| ∠C13-C12-C10 | 120.5(4) | ∠C28-C30-C29 | 120.2(3)   | ∠C35-N2-N1  | 108.8(3)   |
| ∠C9-C11-C10  | 120.0(4) | ∠O4-C25-C29  | 123.6(3)   | ∠C23-N1-N2  | 116.1(3)   |
| ∠C12-C10-C11 | 120.0(4) | ∠C2-C1-C3    | 119.5(4)   | ∠O1-C35-N2  | 124.5(3)   |
| ∠C13-C8-C14  | 121.6(3) | ∠C25-C29-C30 | 119.6(3)   | ∠C14-N4-N3  | 108.4(3)   |
| ∠C9-C8-C14   | 119.0(3) | ∠C2-C1-C35   | 119.9(4)   | ∠C15-N3-N4  | 117.3(3)   |
| ∠C17-C16-C15 | 124.0(3) | ∠C3-C1-C35   | 120.5(4)   | ∠O2-C14-N4  | 124.4(3)   |
| ∠C20-C16-C15 | 116.3(3) | ∠C1-C2-C4    | 119.8(4)   | ∠N1-Cu2-O1  | 81.69(11)  |
| ∠C19-C20-C16 | 120.9(3) | ∠O7-C41-C42  | 117.9(7)   | ∠N3-Cu1-O2  | 81.26(11)  |
| ∠C21-C17-C16 | 118.1(3) | ∠C4-C6-C5    | 119.5(4)   | ∠N1-Cu2-O3  | 110.88(11) |
| ∠N3-C15-C16  | 125.1(3) | ∠C3-C5-C6    | 119.8(5)   | ∠O1-Cu2-O3  | 89.77(9)   |
| ∠O5-C17-C16  | 123.8(3) | ∠C11-C9-C8   | 120.0(4)   | ∠O5-Cu2-O3  | 74.60(9)   |
| ∠C18-C21-C17 | 121.3(3) | ∠C12-C13-C8  | 120.1(4)   | ∠O6-Cu2-O3  | 95.50(9)   |
| ∠O3-C21-C17  | 114.3(3) | ∠N4-C14-C8   | 117.0(3)   | ∠N3-Cu1-O4  | 111.79(10) |
| ∠O3-C21-C18  | 124.4(3) | ∠O2-C14-C8   | 118.6(3)   | ∠O2-Cu1-O4  | 87.71(10)  |
| ∠C21-C18-C19 | 120.5(3) | ∠C13-C8-C9   | 119.4(3)   | ∠O5-Cu1-O4  | 96.88(9)   |
| ∠C6-C4-C2    | 121.2(4) | ∠C14-O2-Cu1  | 110.7(2)   | ∠O6-Cu1-O4  | 76.07(9)   |
| ∠C17-C16-C20 | 119.6(3) | ∠C15-N3-Cu1  | 127.4(2)   | ∠N1-Cu2-O5  | 174.16(12) |
| ∠C18-C19-C20 | 119.6(3) | ∠C17-O5-Cu1  | 125.3(2)   | ∠N3-Cu1-O5  | 93.68(11)  |
| ∠O5-C17-C21  | 118.1(3) | ∠C25-O4-Cu1  | 110.41(19) | ∠O1-Cu2-O5  | 96.57(10)  |
| ∠C21-O3-C22  | 117.8(3) | ∠C26-O4-Cu1  | 125.5(2)   | ∠O2-Cu1-O5  | 174.18(10) |
| ∠C27-C24-C23 | 123.8(3) | ∠C27-O6-Cu1  | 119.7(2)   | ∠O6-Cu2-O5  | 90.14(9)   |
| ∠C28-C24-C23 | 116.4(3) | ∠Cu2-O6-Cu1  | 111.79(11) | ∠N1-Cu2-O6  | 91.28(11)  |
| ∠C30-C28-C24 | 120.8(3) | ∠N4-N3-Cu1   | 115.3(2)   | ∠N3-Cu1-O6  | 171.72(11) |
| ∠N1-C23-C24  | 124.2(3) | ∠C17-O5-Cu2  | 120.9(2)   | ∠O1-Cu2-O6  | 172.38(10) |
| ∠O6-C27-C24  | 123.8(3) | ∠C21-O3-Cu2  | 111.89(19) | ∠O2-Cu1-O6  | 96.85(10)  |
| ∠C24-C27-C25 | 118.4(3) | ∠C22-O3-Cu2  | 127.3(2)   | ∠O5-Cu1-O6  | 87.76(9)   |
| ∠O6-C27-C25  | 117.7(3) | ∠C23-N1-Cu2  | 129.5(2)   |             |            |
| ∠C25-O4-C26  | 117.8(3) | ∠C27-O6-Cu2  | 126.7(2)   |             |            |

---

**Table S4.** Selected angle and bond lengths (Å) for complexes **C**

|         |           |        |           |        |           |
|---------|-----------|--------|-----------|--------|-----------|
| C10-C11 | 1.465(8)  | Cu1-O2 | 1.876(6)  | N6-C21 | 1.329(10) |
| C11-C12 | 1.39      | Cu1-O3 | 1.926(6)  | N6-C22 | 1.441(12) |
| C11-C16 | 1.39      | Cu1-O7 | 2.308(5)  | N6-C23 | 1.449(11) |
| C12-C13 | 1.39      | Cu1-O8 | 2.015(5)  | O10-N7 | 1.272(9)  |
| C13-C14 | 1.39      | Cu2-N2 | 1.967(7)  | O11-N7 | 1.235(10) |
| C14-C15 | 1.39      | Cu2-N4 | 1.956(6)  | O1-C1  | 1.424(11) |
| C15-C16 | 1.39      | Cu2-O4 | 1.890(5)  | O1-C2  | 1.368(7)  |
| C2-C3   | 1.39      | Cu2-O6 | 1.979(6)  | O2-C7  | 1.333(7)  |
| C2-C7   | 1.39      | N1-C8  | 1.297(11) | O3-C9  | 1.276(9)  |
| C3-C4   | 1.39      | N1-N2  | 1.393(9)  | O4-C16 | 1.350(6)  |
| C4-C5   | 1.39      | N3-C9  | 1.366(10) | O5-C15 | 1.376(7)  |
| C5-C6   | 1.39      | N3-N4  | 1.385(9)  | O5-C17 | 1.432(10) |
| C6-C7   | 1.39      | N4-C10 | 1.296(10) | O6-C18 | 1.273(10) |
| C6-C8   | 1.464(9)  | N5-C18 | 1.305(11) | O7-C21 | 1.247(10) |
| C9-N2   | 1.347(10) | N5-C19 | 1.469(13) | O9-N7  | 1.246(11) |
| Cu1-N1  | 1.936(6)  | N5-C20 | 1.463(15) |        |           |



---

|              |          |             |            |             |          |
|--------------|----------|-------------|------------|-------------|----------|
| ∠C10-N4-Cu2  | 129.4(5) | ∠C6-C5-C4   | 120        | ∠O1-C2-C7   | 115.4(4) |
| ∠C10-N4-N3   | 117.8(7) | ∠C6-C7-C2   | 120        | ∠O2-C7-C2   | 115.6(4) |
| ∠C12-C11-C10 | 118.0(4) | ∠C7-C6-C5   | 120        | ∠O2-C7-C6   | 124.4(4) |
| ∠C12-C11-C16 | 120      | ∠C7-C6-C8   | 123.5(5)   | ∠O2-Cu1-N1  | 93.5(3)  |
| ∠C13-C12-C11 | 120      | ∠C7-O2-Cu1  | 127.2(4)   | ∠O2-Cu1-O3  | 174.4(2) |
| ∠C13-C14-C15 | 120      | ∠C8-N1-Cu1  | 126.5(5)   | ∠O2-Cu1-O7  | 89.1(2)  |
| ∠C14-C13-C12 | 120      | ∠C8-N1-N2   | 119.6(6)   | ∠O2-Cu1-O8  | 91.6(2)  |
| ∠C14-C15-C16 | 120      | ∠C9-N2-Cu2  | 113.4(5)   | ∠O3-C9-N2   | 124.9(7) |
| ∠C15-C16-C11 | 120      | ∠C9-N2-N1   | 108.7(6)   | ∠O3-C9-N3   | 118.6(7) |
| ∠C15-O5-C17  | 118.2(6) | ∠C9-N3-N4   | 115.0(7)   | ∠O3-Cu1-N1  | 82.2(2)  |
| ∠C16-C11-C10 | 121.8(4) | ∠C9-O3-Cu1  | 110.2(5)   | ∠O3-Cu1-O7  | 90.5(2)  |
| ∠C16-O4-Cu2  | 127.3(4) | ∠N1-C8-C6   | 123.3(6)   | ∠O3-Cu1-O8  | 93.9(2)  |
| ∠C18-N5-C19  | 121.0(8) | ∠N1-Cu1-O7  | 125.1(2)   | ∠O4-C16-C11 | 123.2(4) |
| ∠C18-N5-C20  | 121.7(9) | ∠N1-Cu1-O8  | 146.5(2)   | ∠O4-C16-C15 | 116.5(4) |
| ∠C18-O6-Cu2  | 120.3(5) | ∠N1-N2-Cu2  | 137.9(5)   | ∠O4-Cu2-N2  | 170.2(3) |
| ∠C20-N5-C19  | 117.3(9) | ∠N2-C9-N3   | 116.5(6)   | ∠O4-Cu2-N4  | 89.5(3)  |
| ∠C21-N6-C22  | 120.4(8) | ∠N2-Cu2-O6  | 100.7(2)   | ∠O4-Cu2-O6  | 89.0(2)  |
| ∠C21-N6-C23  | 121.9(7) | ∠N2-N1-Cu1  | 113.7(5)   | ∠O5-C15-C14 | 124.8(4) |
| ∠C21-O7-Cu1  | 121.0(5) | ∠N3-N4-Cu2  | 112.8(5)   | ∠O5-C15-C16 | 115.2(4) |
| ∠C22-N6-C23  | 117.4(7) | ∠N4-C10-C11 | 123.0(7)   | ∠O6-C18-N5  | 123.2(8) |
| ∠C2-O1-C1    | 118.9(7) | ∠N4-Cu2-N2  | 81.3(3)    | ∠O7-C21-N6  | 125.0(8) |
| ∠C3-C2-C7    | 120      | ∠N4-Cu2-O6  | 171.01(19) | ∠O8-Cu1-O7  | 88.0(2)  |
| ∠C3-C4-C5    | 120      | ∠O11-N7-O10 | 119.1(7)   | ∠O9-N7-O10  | 119.0(8) |
| ∠C4-C3-C2    | 120      | ∠O11-N7-O9  | 121.9(7)   |             |          |
| ∠C5-C6-C8    | 116.4(5) | ∠O1-C2-C3   | 124.5(4)   |             |          |

---

**Table S5.** Summary of SHAPE<sup>1</sup> analysis for complexes **A**, **B** and **C**.

| Vertices | Code | Label   | Shape                                                       | Symmetry        |
|----------|------|---------|-------------------------------------------------------------|-----------------|
| 4        | 1    | SP-4    | Square                                                      | D <sub>4h</sub> |
|          | 2    | T-4     | Tetrahedron                                                 | T <sub>d</sub>  |
|          | 3    | SS-4    | Seesaw or sawhorse <sup>‡</sup> (cis-divacant octahedron)   | C <sub>2v</sub> |
|          | 4    | vTBPY-4 | Axially vacant trigonal bipyramid                           | C <sub>3v</sub> |
| 5        | 1    | PP-5    | Pentagon                                                    | D <sub>5h</sub> |
|          | 2    | vOC-5   | Vacant octahedron <sup>‡</sup> (Johnson square pyramid, J1) | C <sub>4v</sub> |
|          | 3    | TBPY-5  | Trigonal bipyramid                                          | D <sub>3h</sub> |
|          | 4    | SPY-5   | Square pyramid <sup>§</sup>                                 | C <sub>4v</sub> |
|          | 5    | JTBPY-5 | Johnson trigonal bipyramid (J12)                            | D <sub>3h</sub> |
| 6        | 1    | HP-6    | Hexagon                                                     | D <sub>6h</sub> |
|          | 2    | PPY-6   | Pentagonal pyramid                                          | C <sub>5v</sub> |
|          | 3    | OC-6    | Octahedron                                                  | O <sub>h</sub>  |
|          | 4    | TPR-6   | Trigonal prism                                              | D <sub>3h</sub> |
|          | 5    | JPPY-5  | Johnson pentagonal pyramid (J2)                             | C <sub>5v</sub> |

### Complex A

<sup>1</sup>a) M. Pinsky and D. Avnir, *Inorg. Chem.*, 1998, **37**, 5575; b) D. Casanova, J. Cirera, M. Llundell, P. Alemany, D. Avnir and S. Alvarez, *J. Am. Chem. Soc.*, 2004, **126**, 1755; c) J. Cirera, E. Ruiz and S. Alvarez, *Chem. Eur. J.*, 2006, **12**, 3162; d) D. Casanova, M. Llundell, P. Alemany and S. Alvarez, *Chem. Eur. J.*, 2005, **11**, 1479; e) A. Ruiz-Martínez, D. Casanova and S. Alvarez, *Chem. Eur. J.*, 2008, **14**, 1291.

|      | SP-4         | T-4    | SS-4   | vTBPY-4 |
|------|--------------|--------|--------|---------|
| Cu-1 | <b>0.463</b> | 31.565 | 17.654 | 31.996  |

|      | HP-6   | PPY-6  | OC-6         | TPR-6        | JPPY-6 |
|------|--------|--------|--------------|--------------|--------|
| Cu-2 | 34.321 | 23.116 | <b>4.579</b> | 11.389       | 26.204 |
| Cu-3 | 33.310 | 22.891 | <b>3.955</b> | 12.160       | 26.044 |
| Cu-4 | 32.857 | 16.425 | 15.537       | <b>9.922</b> | 20.168 |

### Complex B

|      | HP-6   | PPY-6  | OC-6         | TPR-6  | JPPY-6 |
|------|--------|--------|--------------|--------|--------|
| Cu-1 | 31.115 | 21.571 | <b>4.521</b> | 12.364 | 24.047 |
| Cu-2 | 33.185 | 22.163 | <b>4.513</b> | 12.691 | 24.987 |

### Complex C

|      | PP-5   | vOC-5 | TBPY-5       | SPY-5        | JTBPY-5 |
|------|--------|-------|--------------|--------------|---------|
| Cu-1 | 28.269 | 4.757 | <b>3.046</b> | 3.570        | 6.915   |
| Cu-2 | 32.465 | 1.775 | 4.906        | <b>1.400</b> | 8.450   |

### **NMR measurement**

$^1\text{H}$  and  $^{13}\text{C}$  NMR spectra were recorded by using d-chloroform and TMS as internal standard. Coupling constant are reported in hertz (Hz) and chemical shifts are in parts per million (ppm).

# $^1\text{H}$ & $^{13}\text{C}$ NMR Spectra

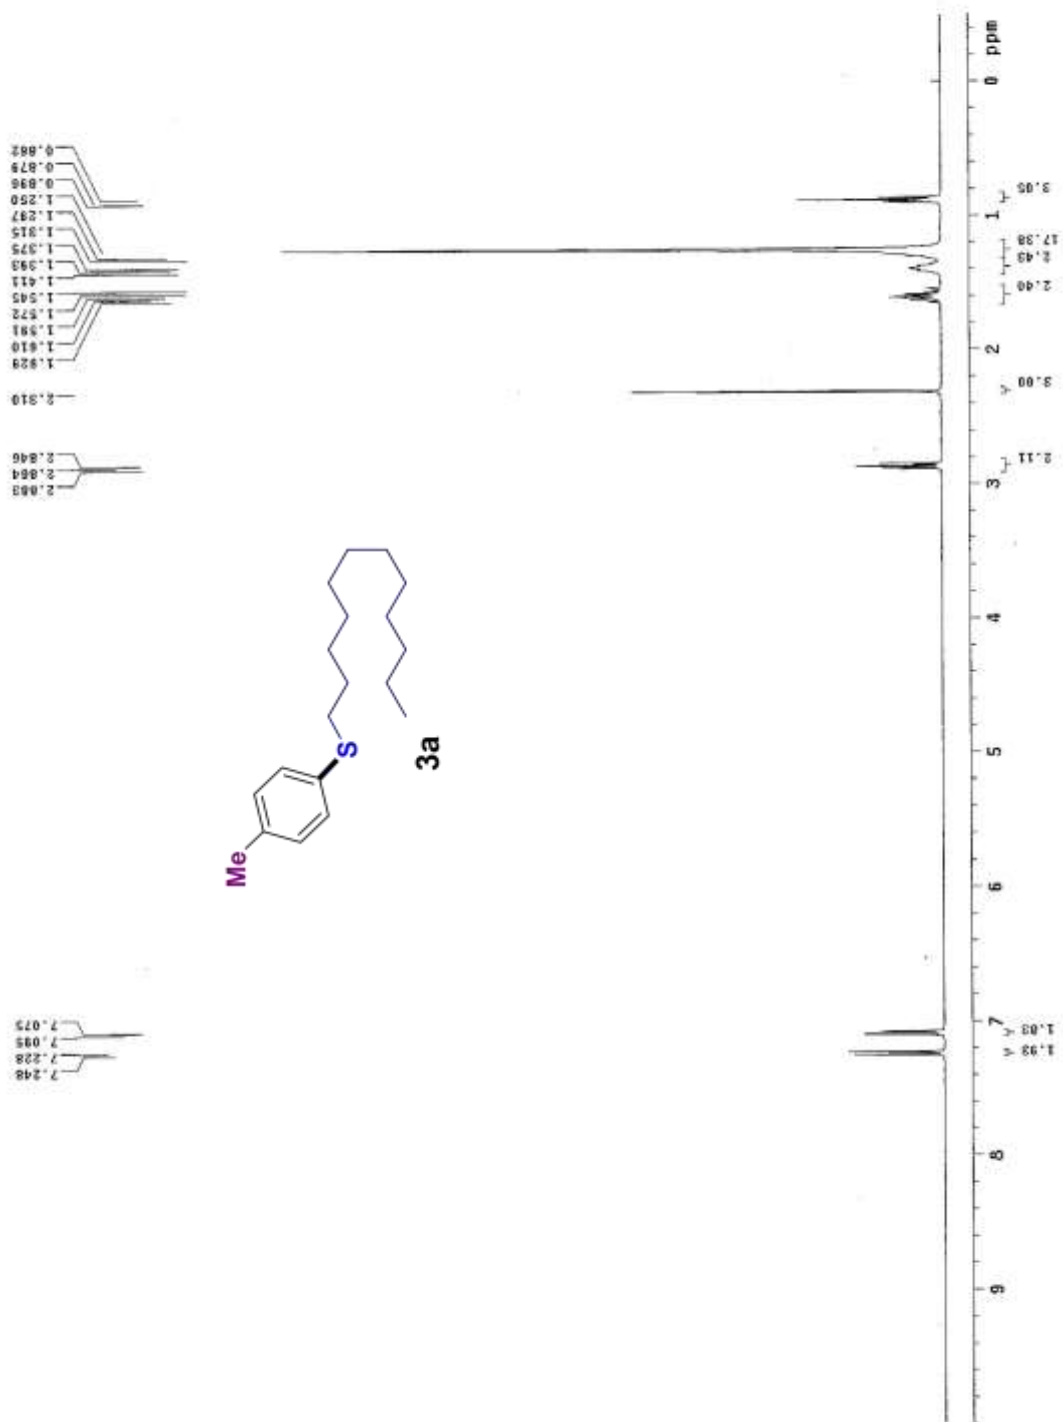

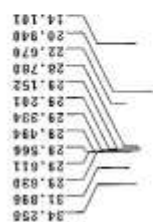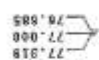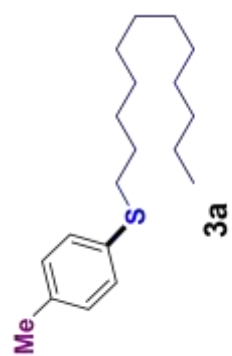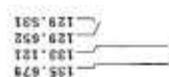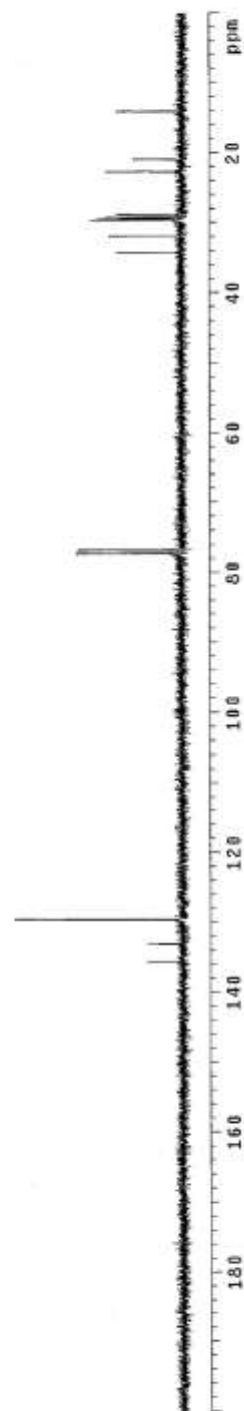

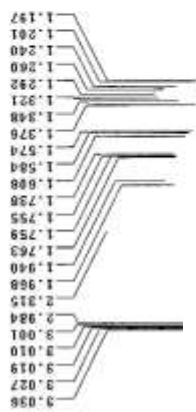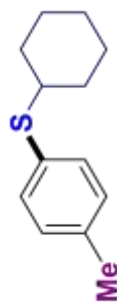

**3b**

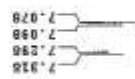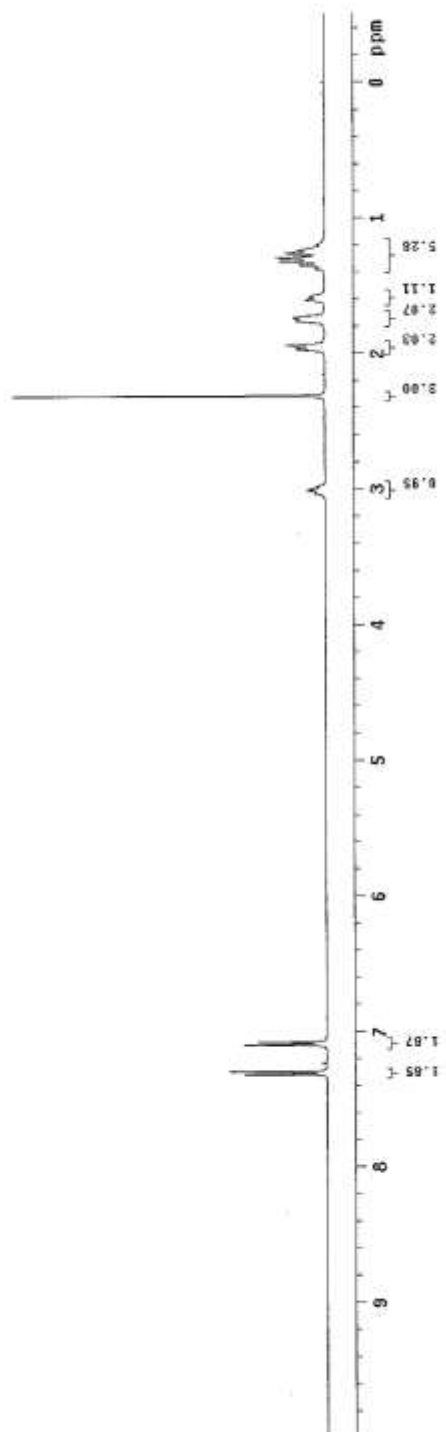

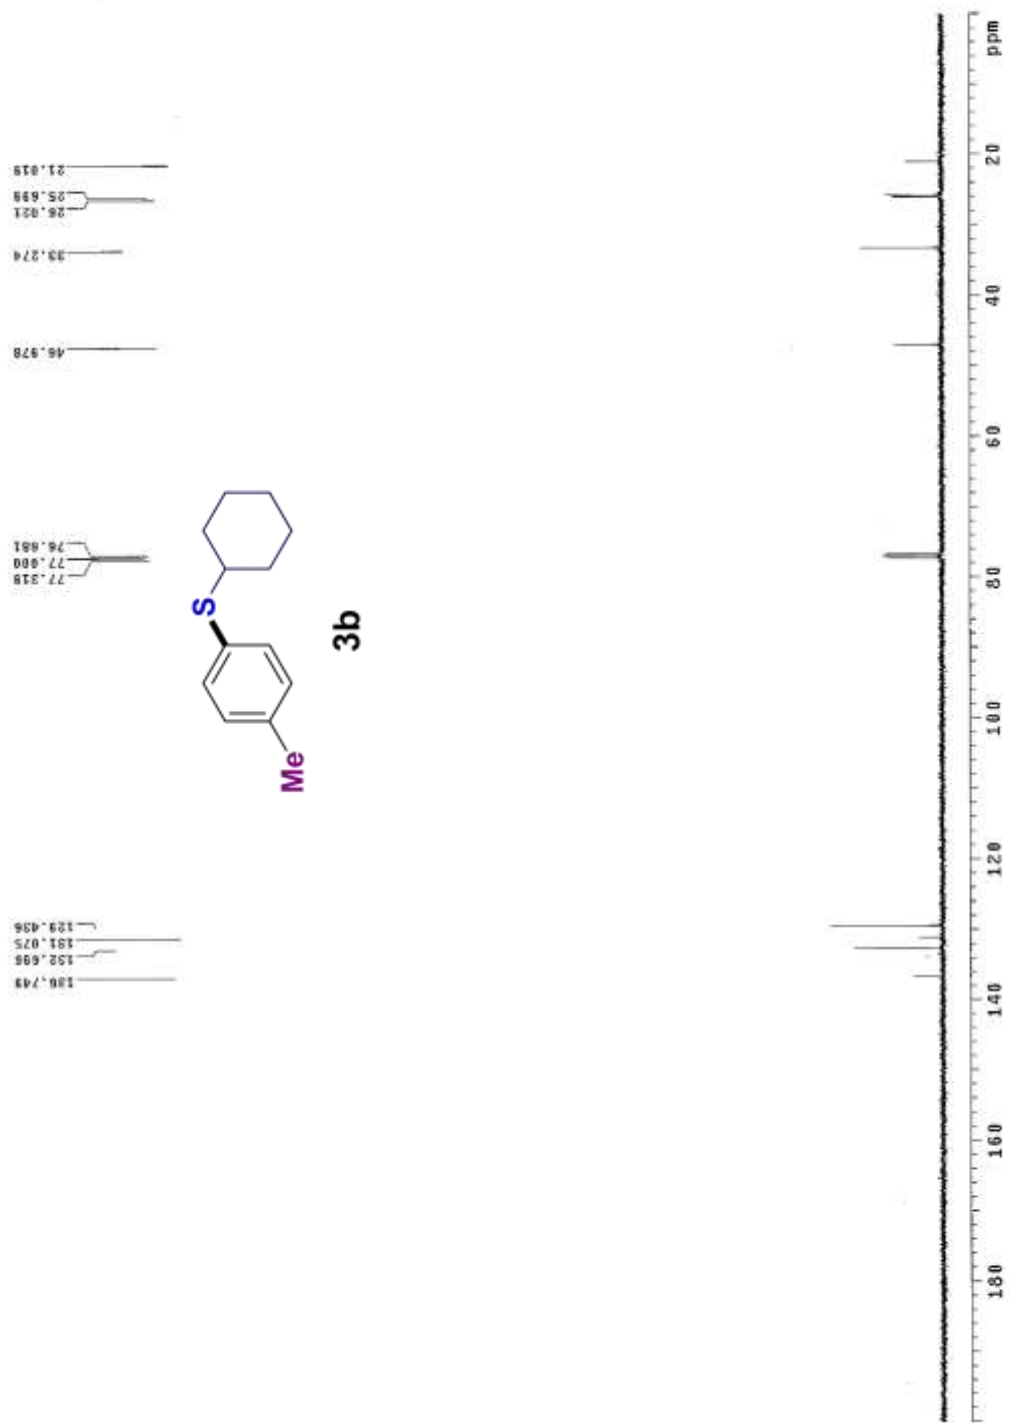



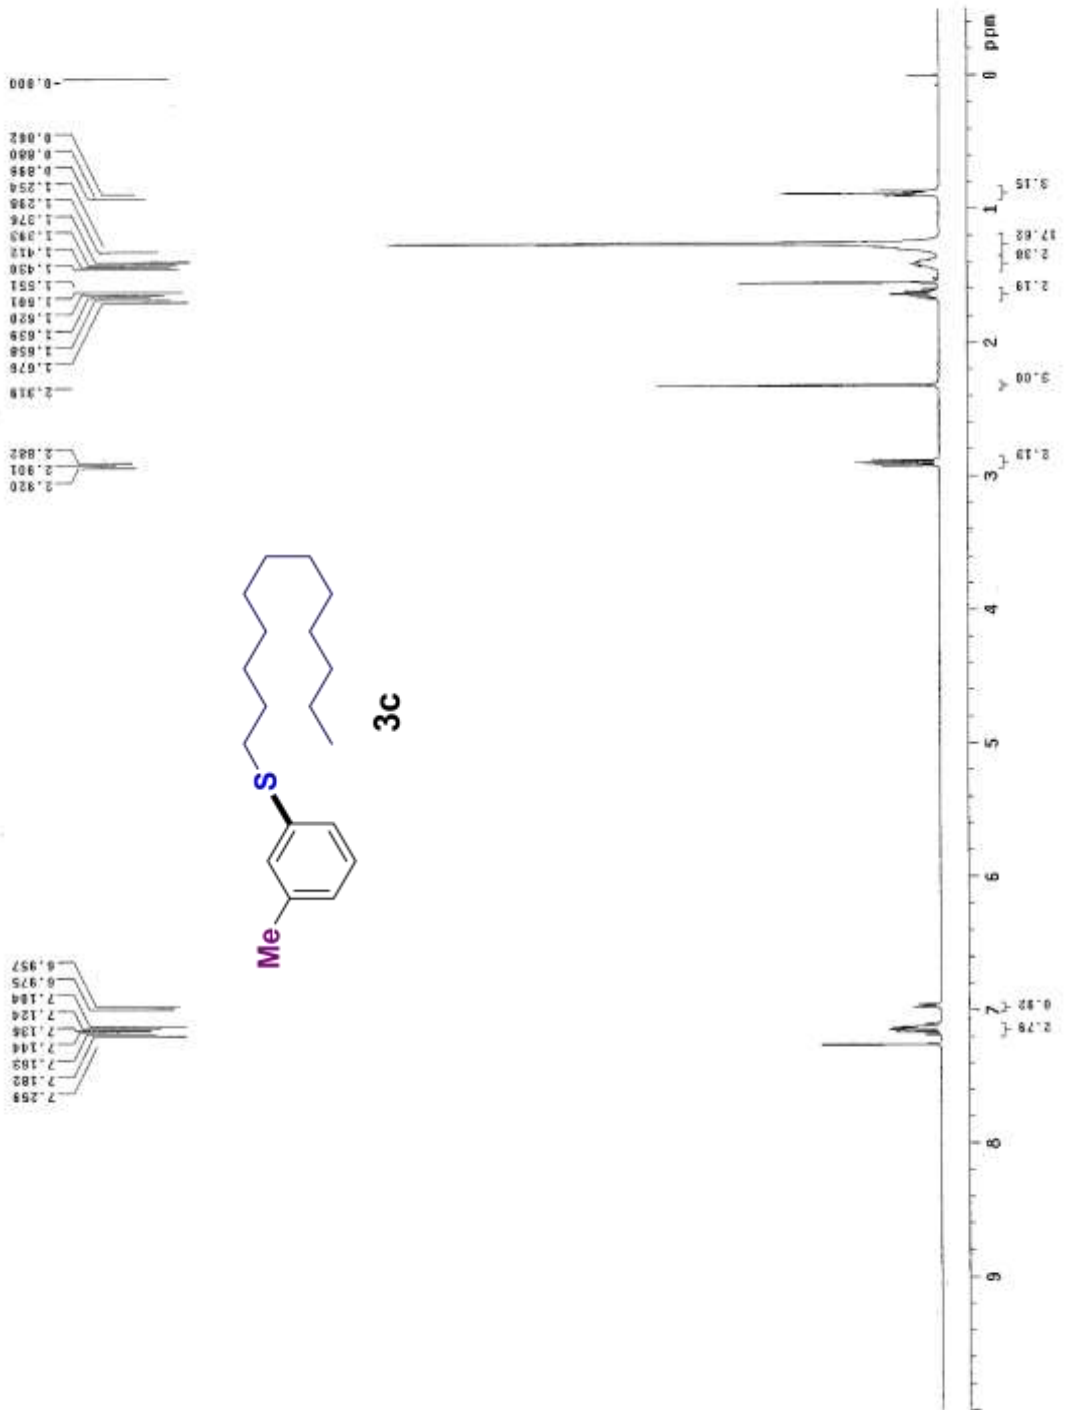

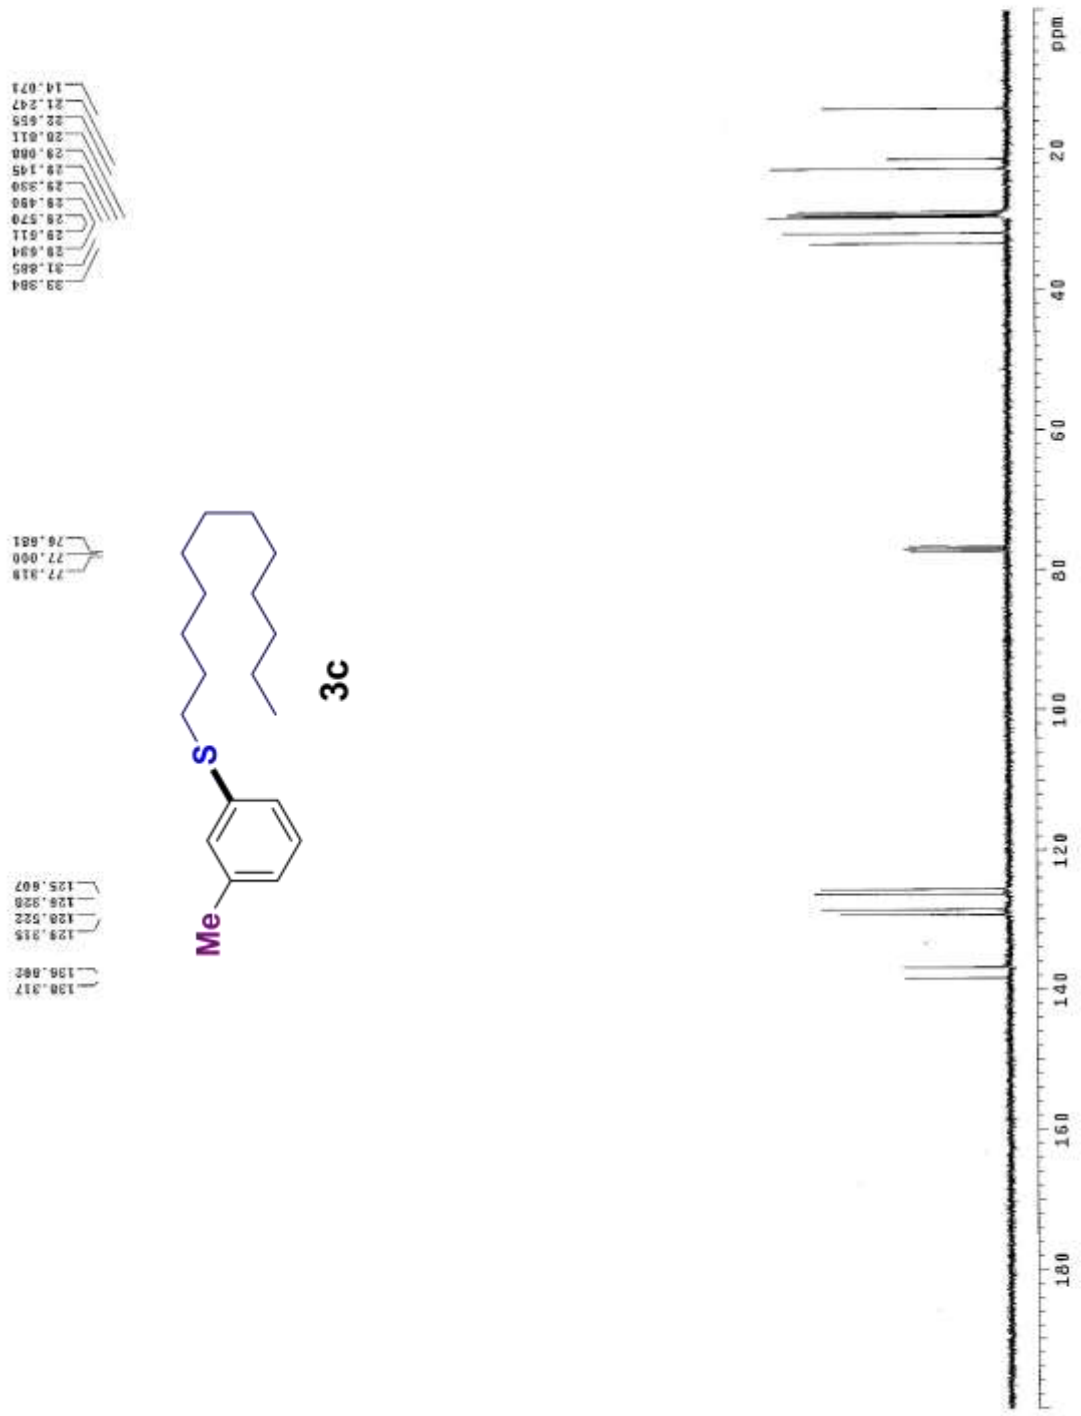

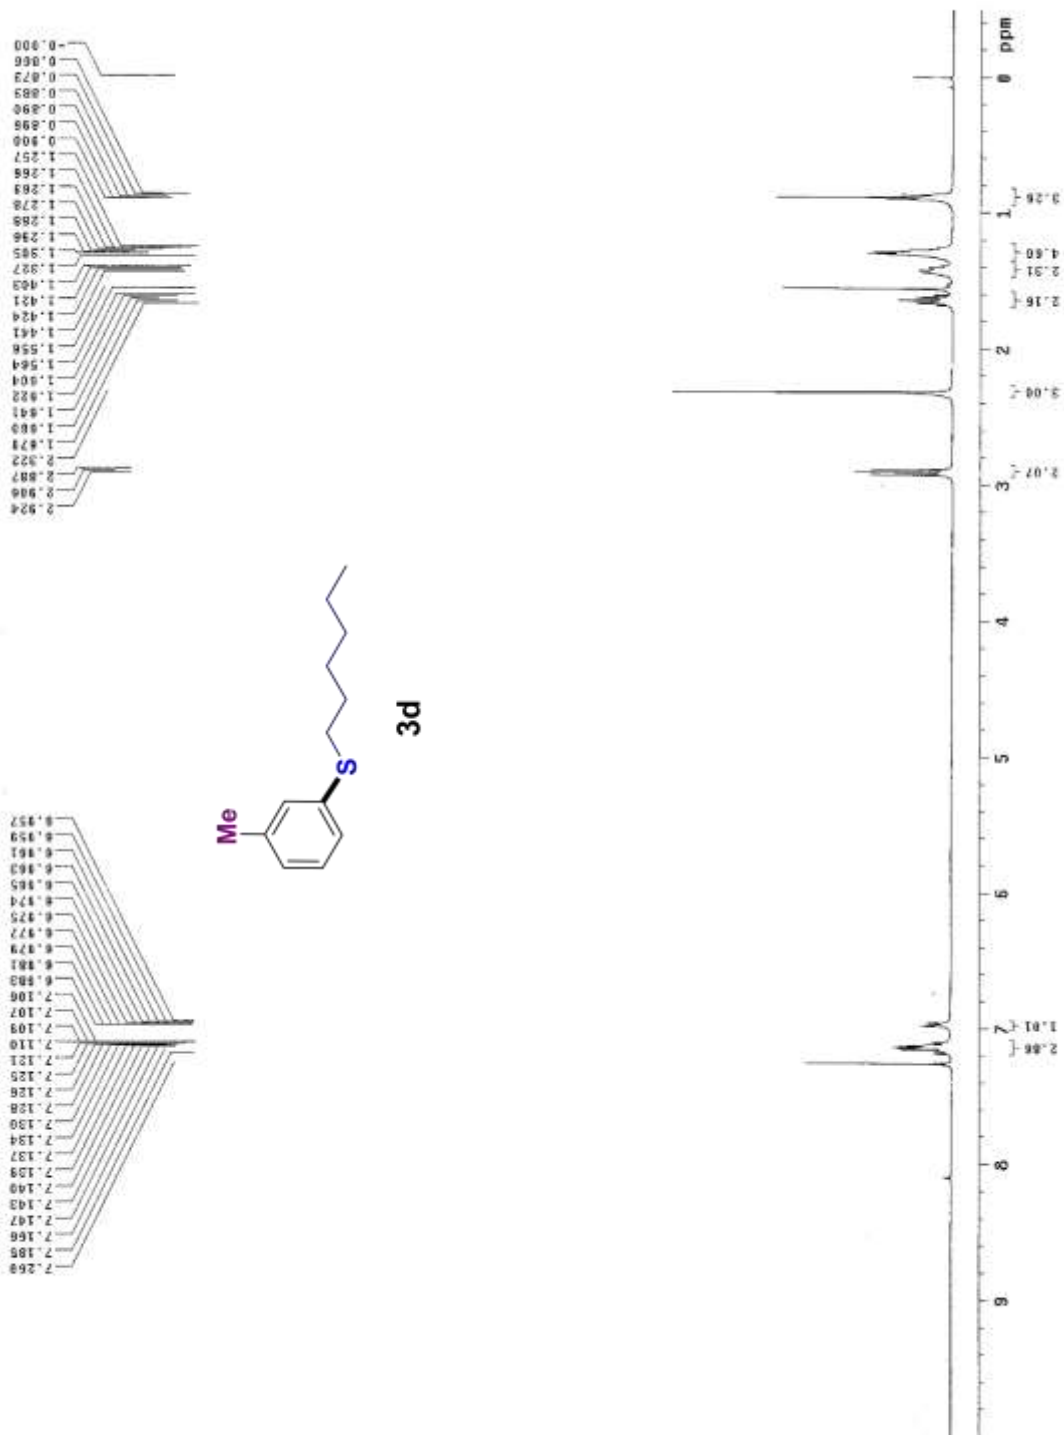

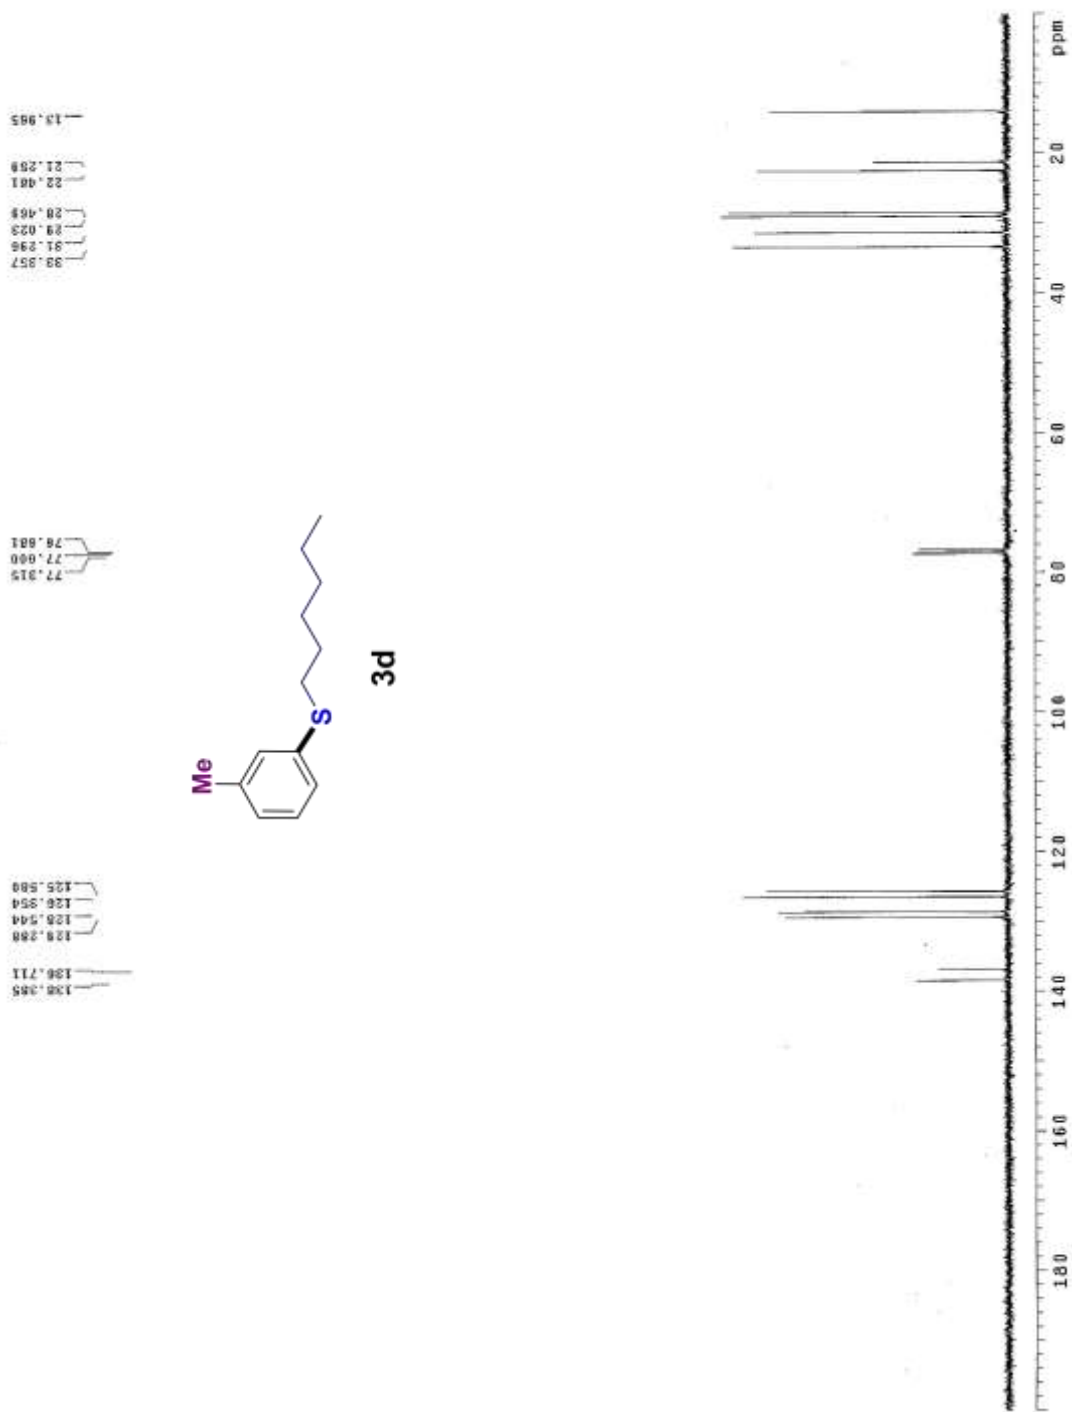



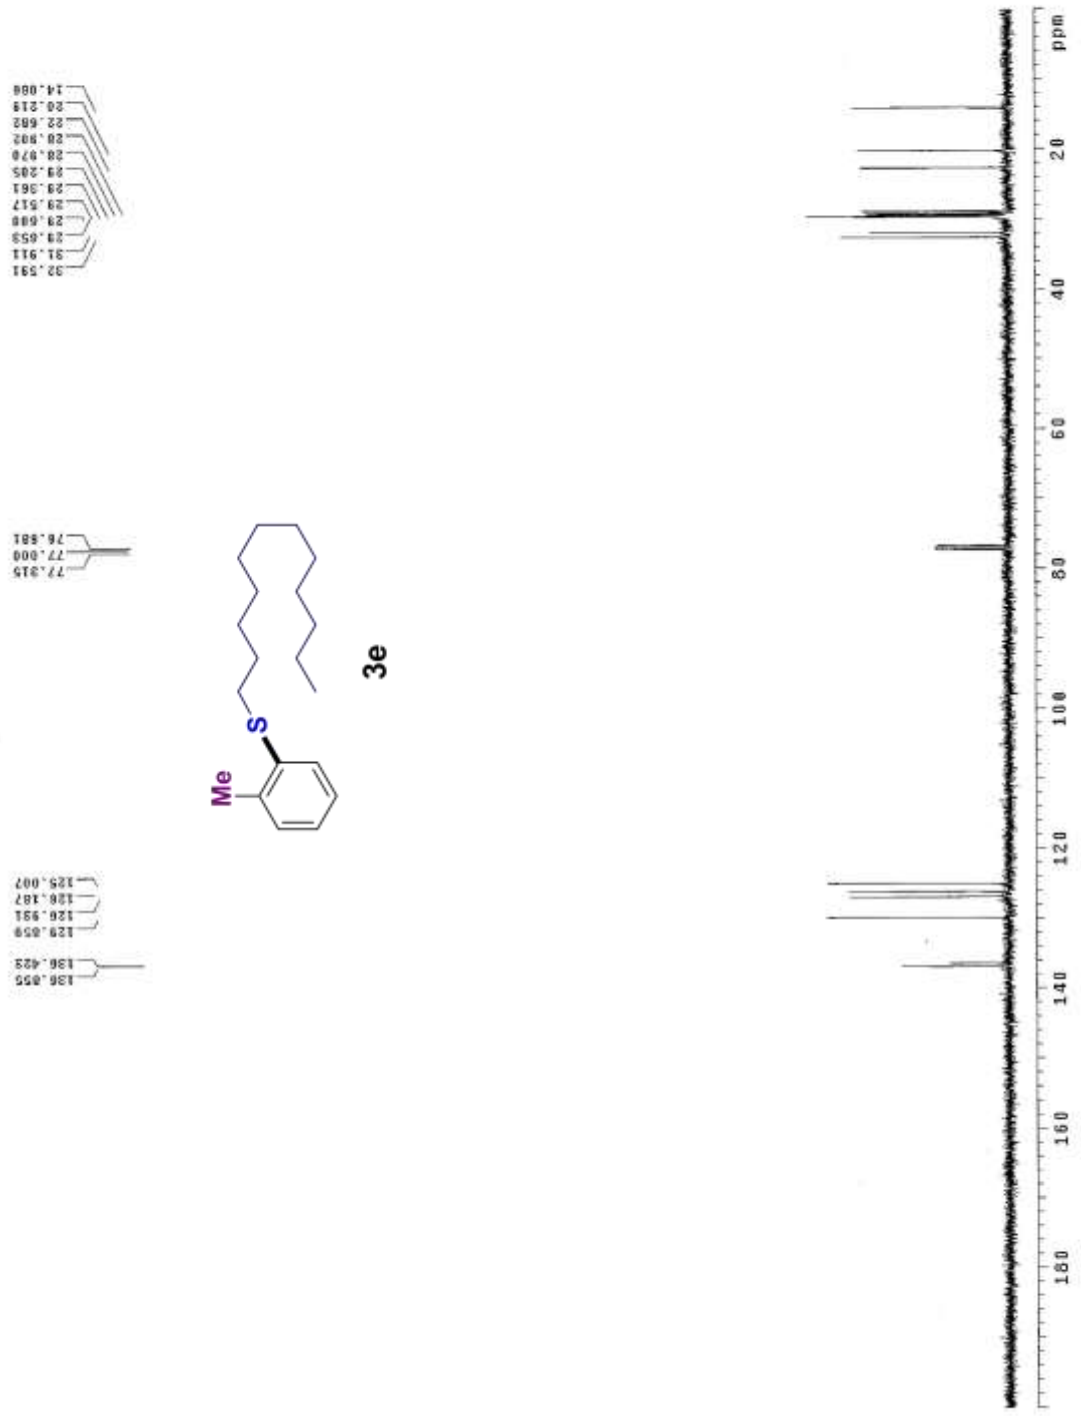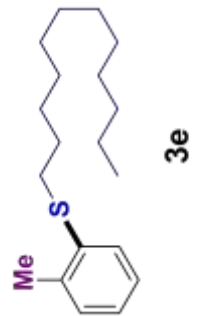



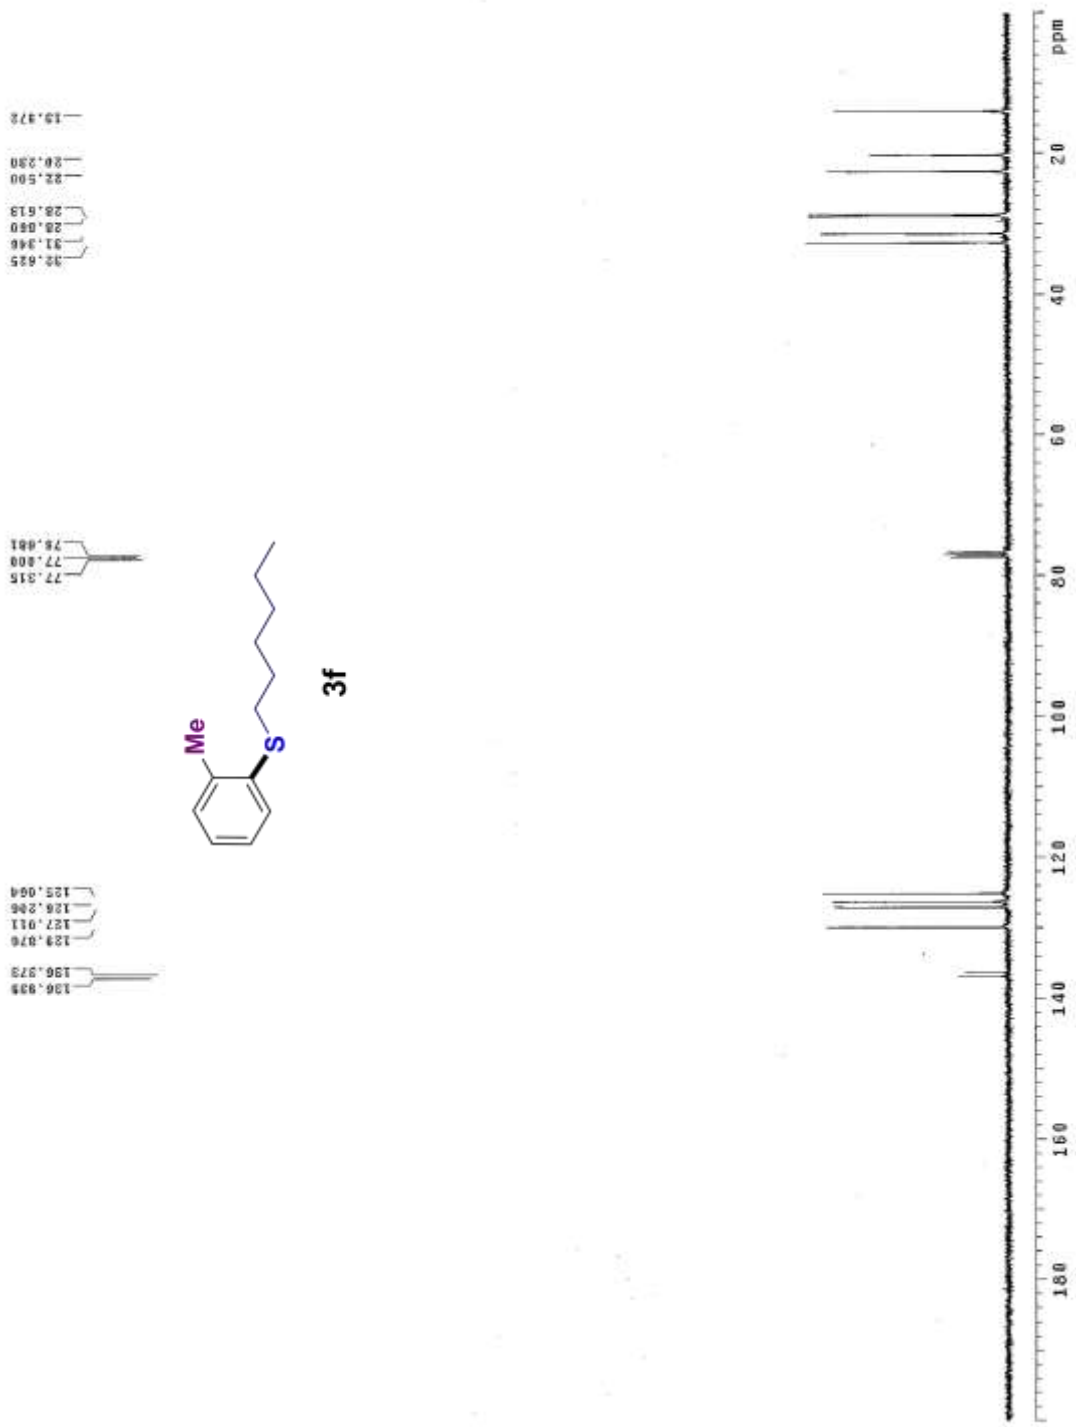



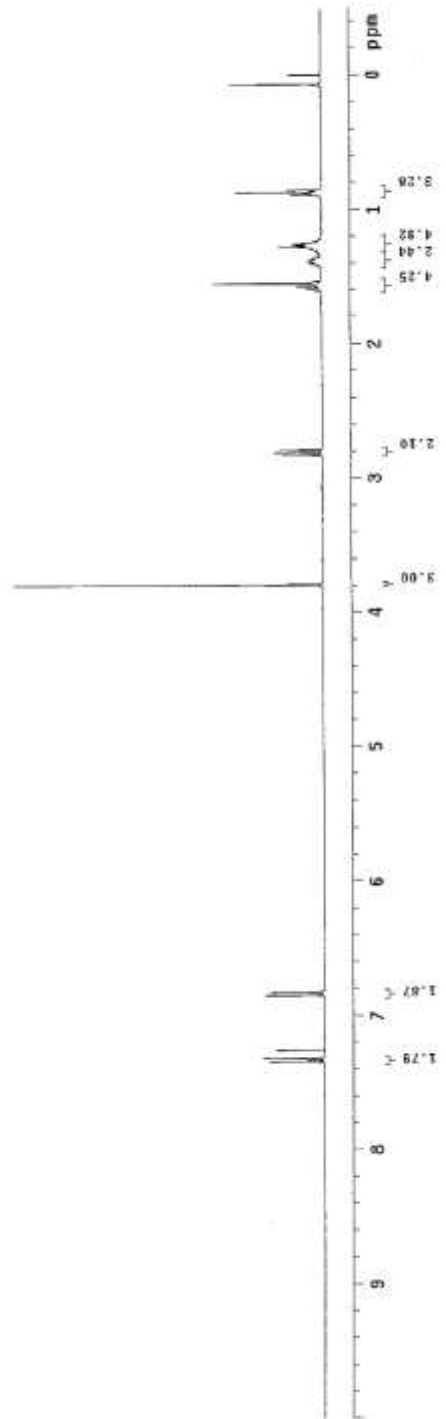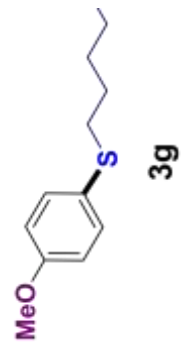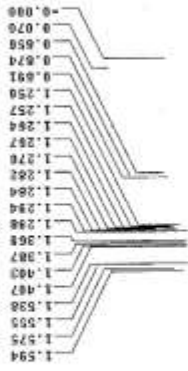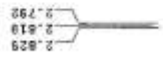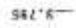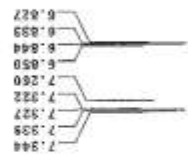

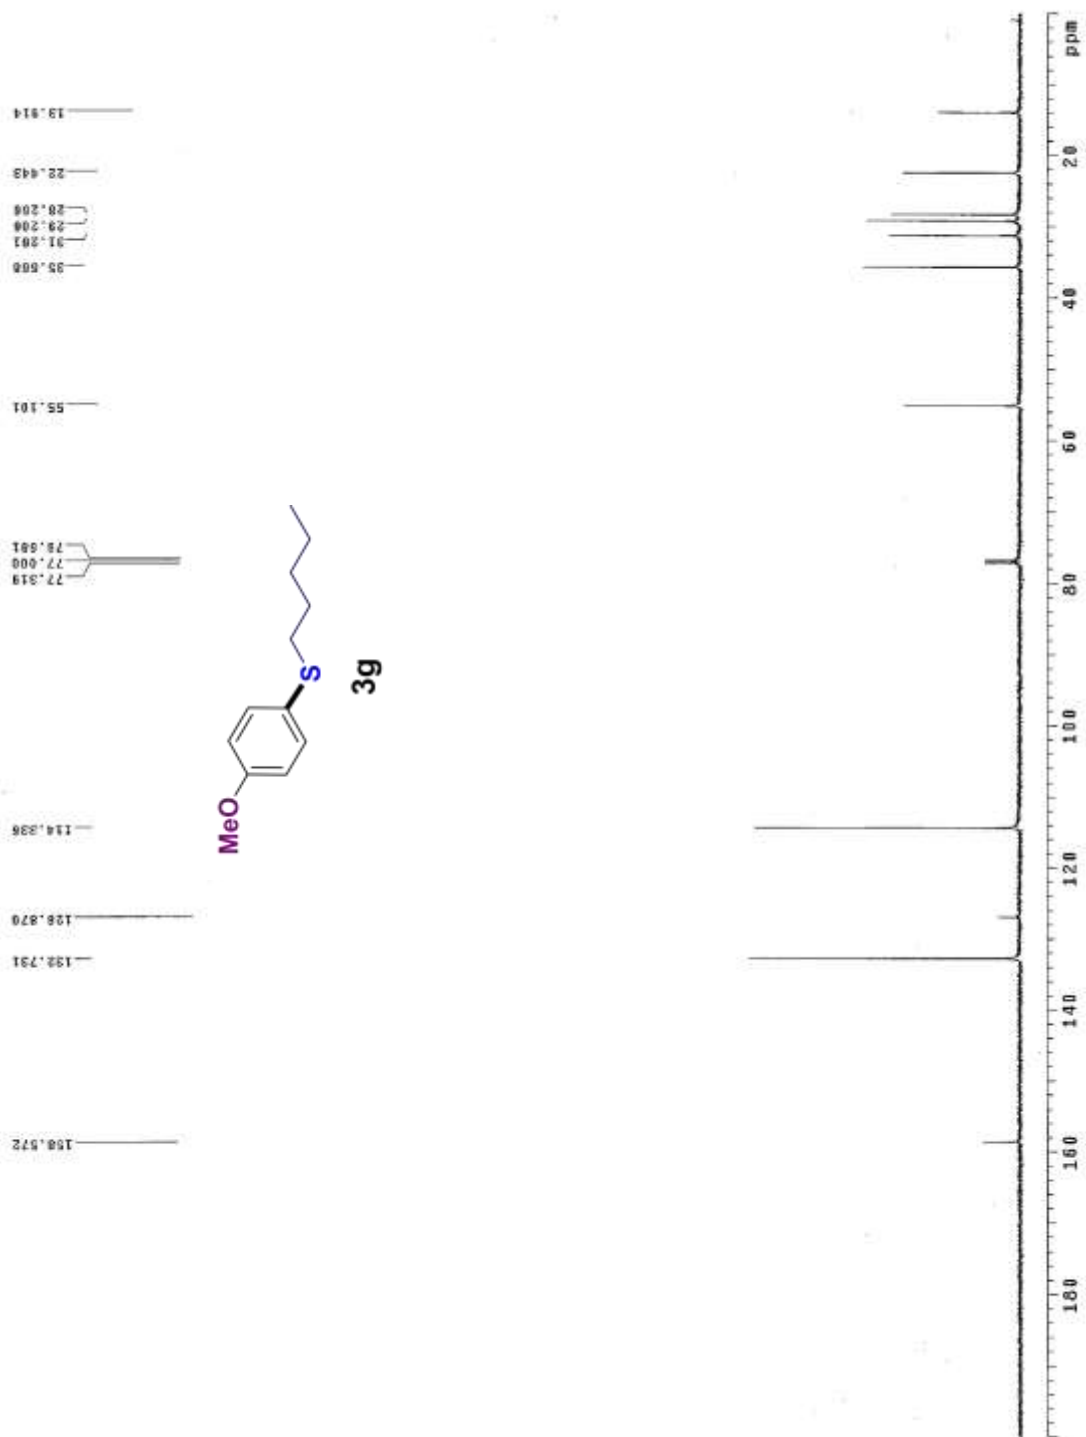

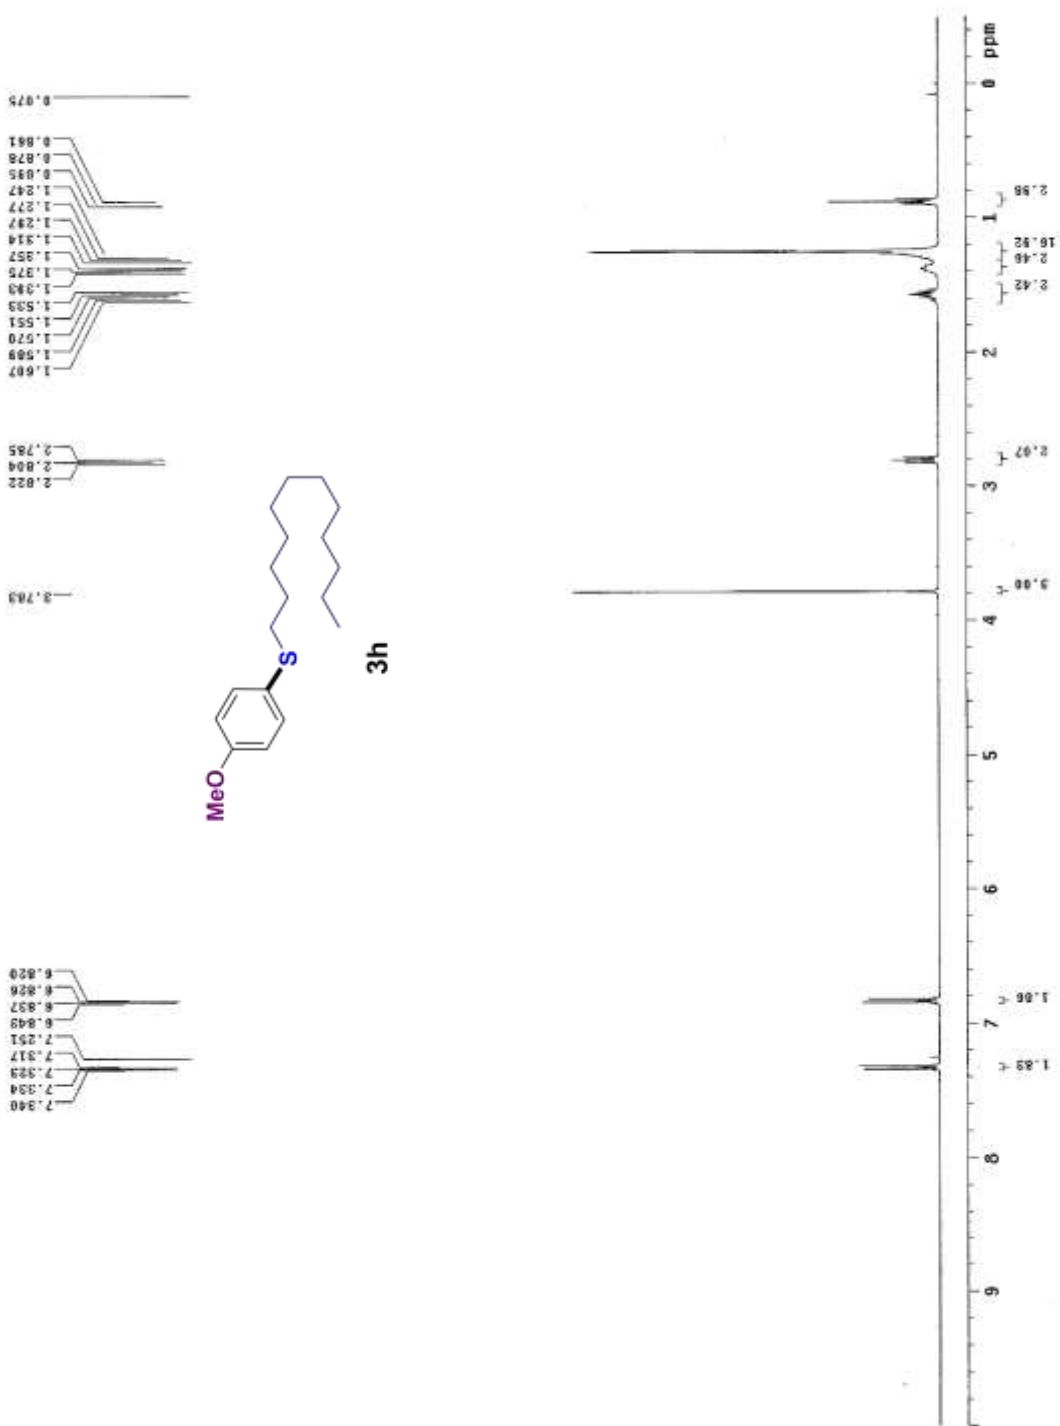

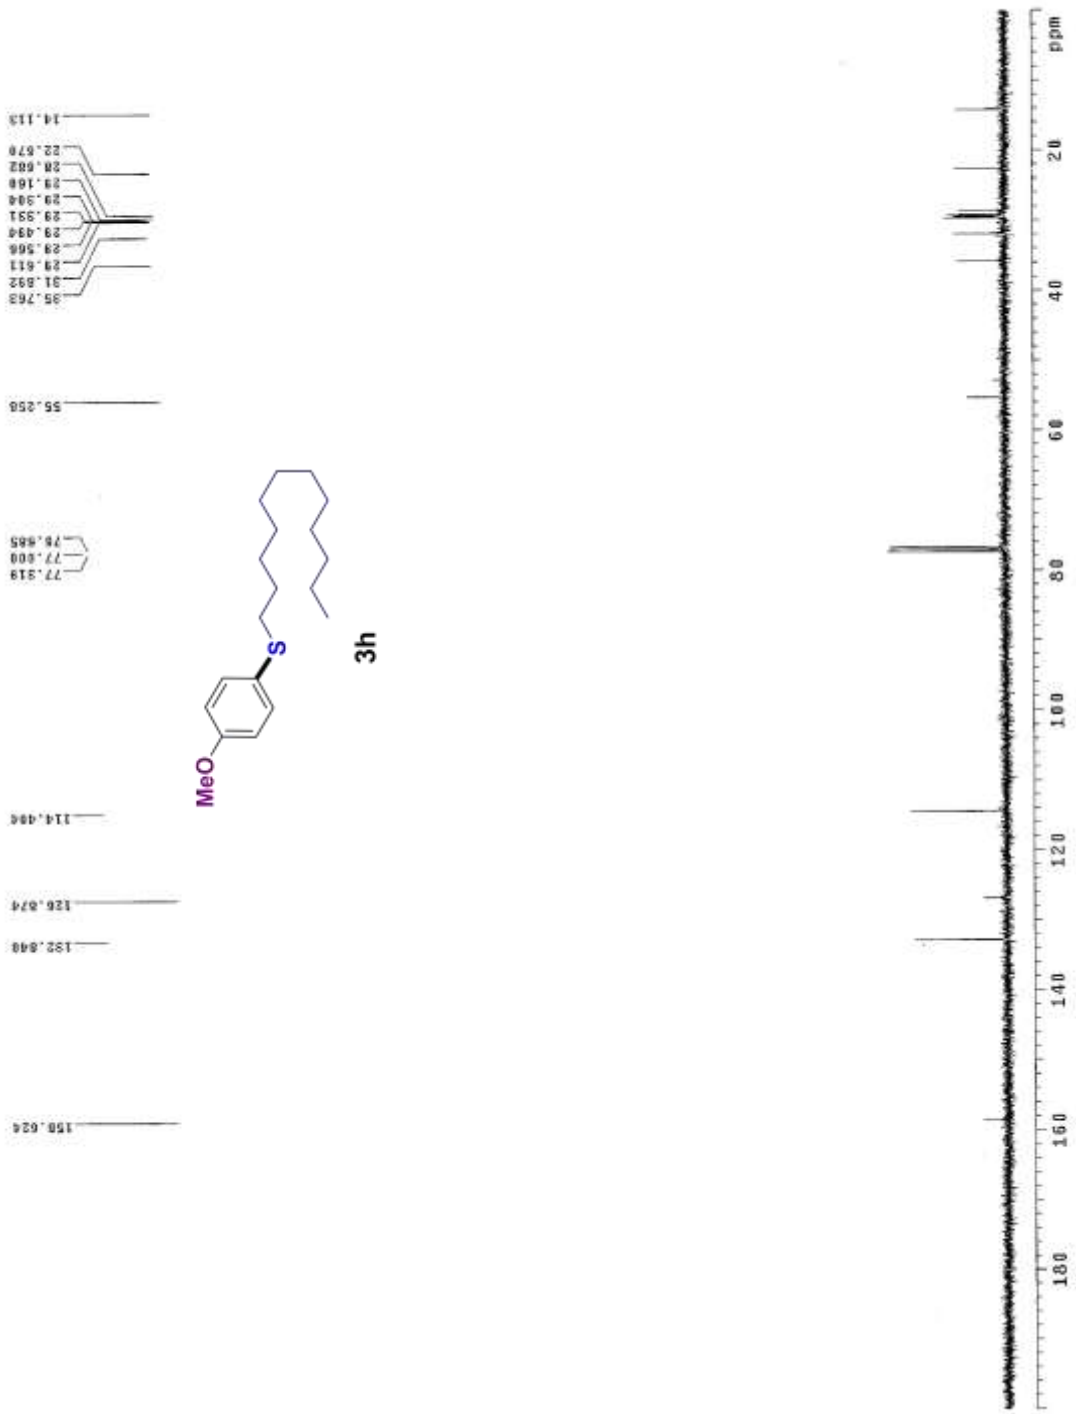

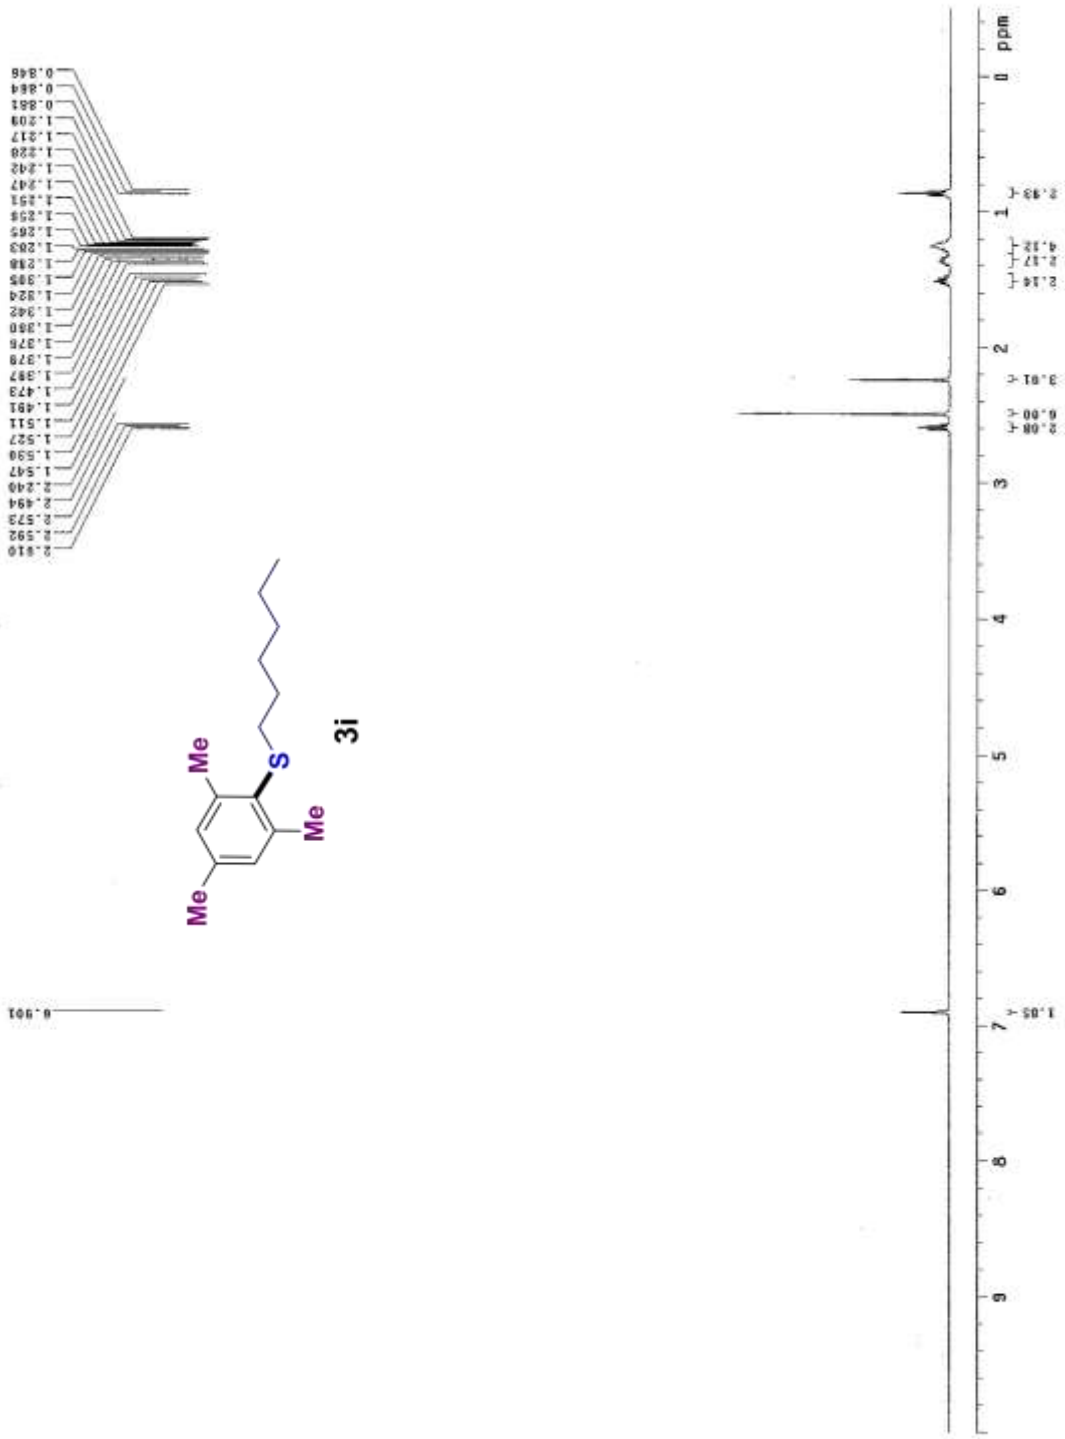

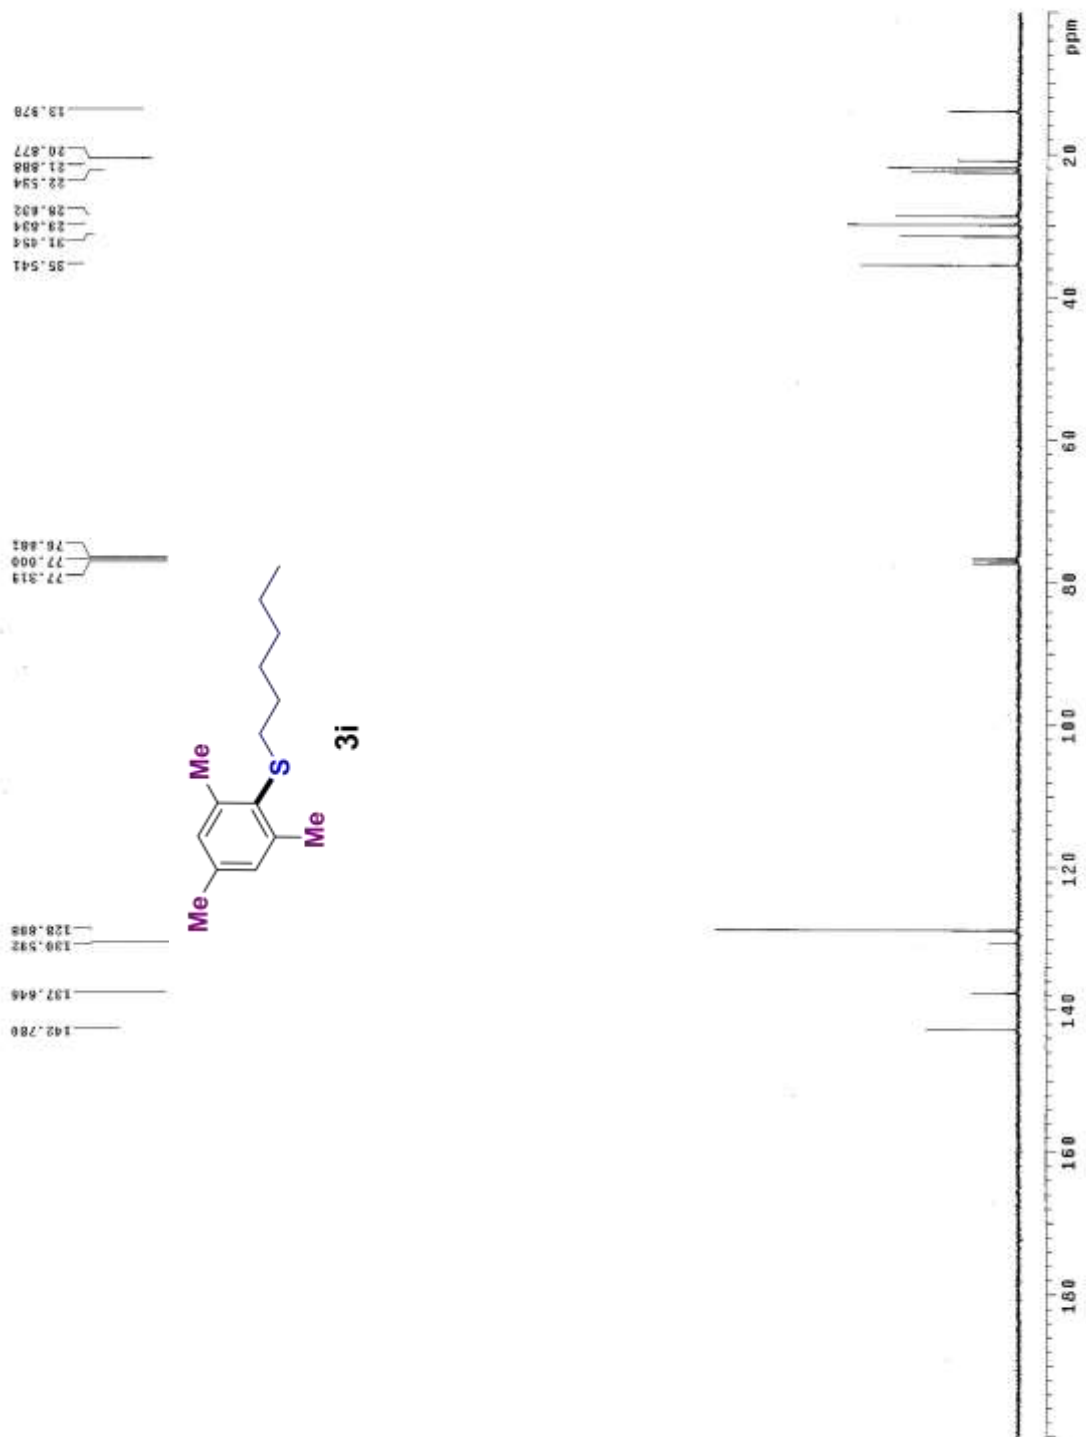

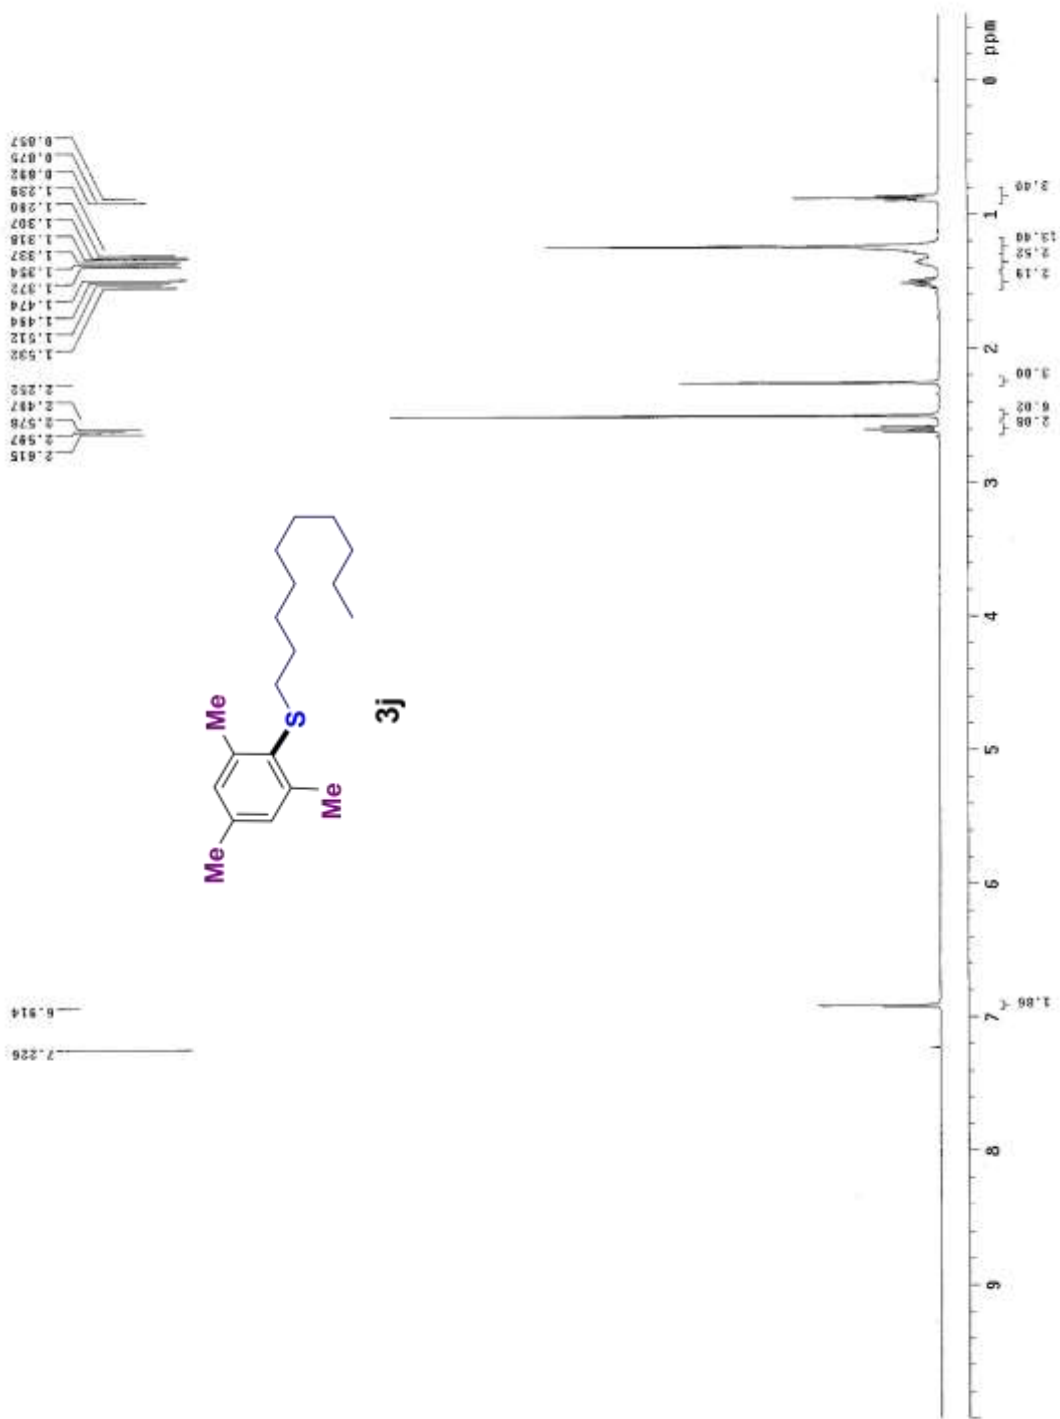

95.524  
31.877  
29.882  
29.543  
29.528  
29.200  
29.243  
28.982  
28.674  
21.948  
20.948  
14.118

77.318  
77.008  
76.881

142.028  
137.717  
130.544  
128.821

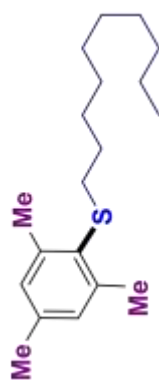

3j

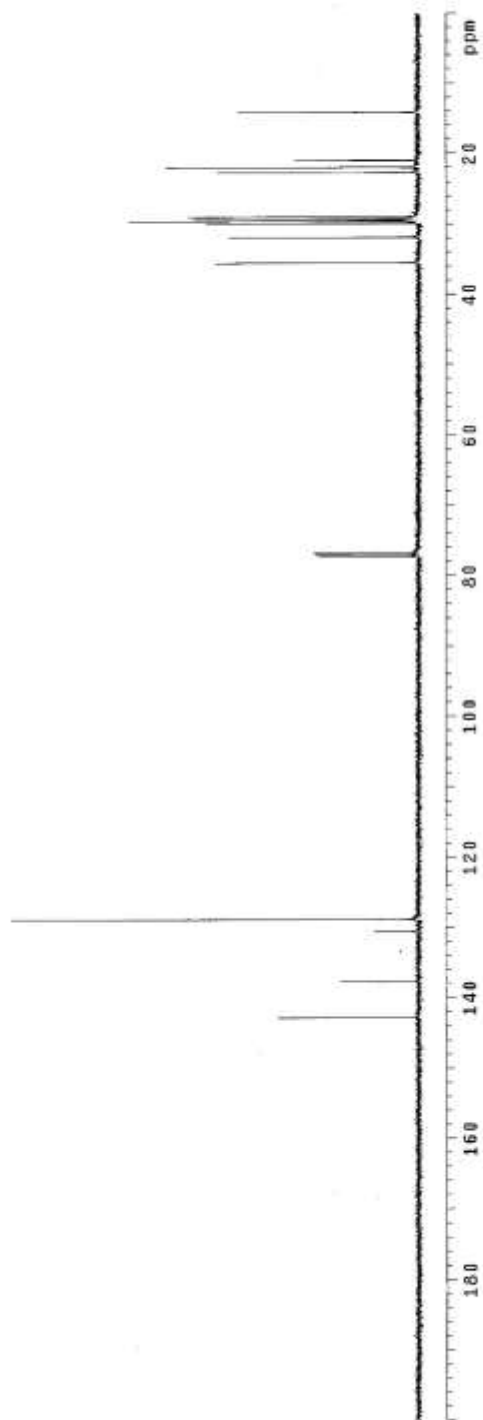



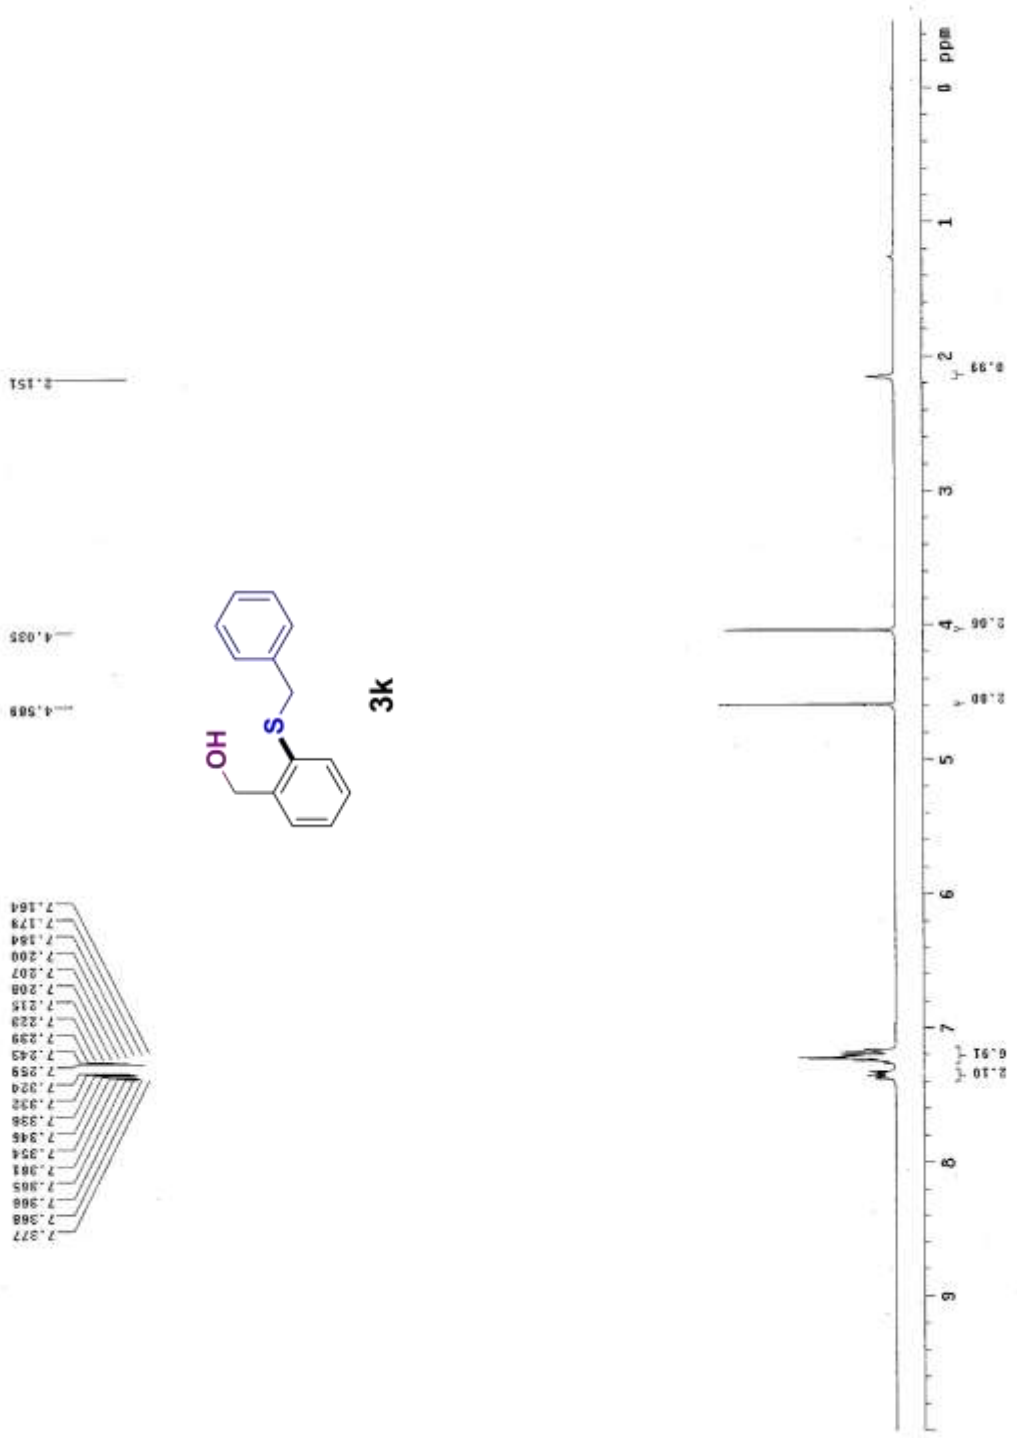

98.076  
69.901  
77.000  
77.019  
76.601

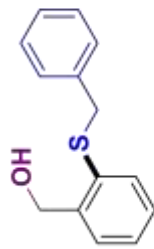

3k

141.576  
137.261  
133.940  
131.550  
128.632  
128.438  
128.240  
128.153  
127.219  
127.291

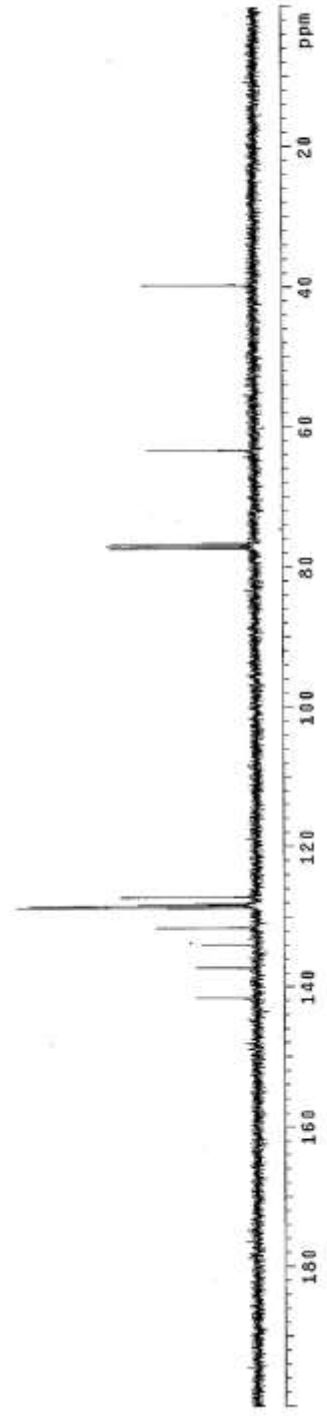

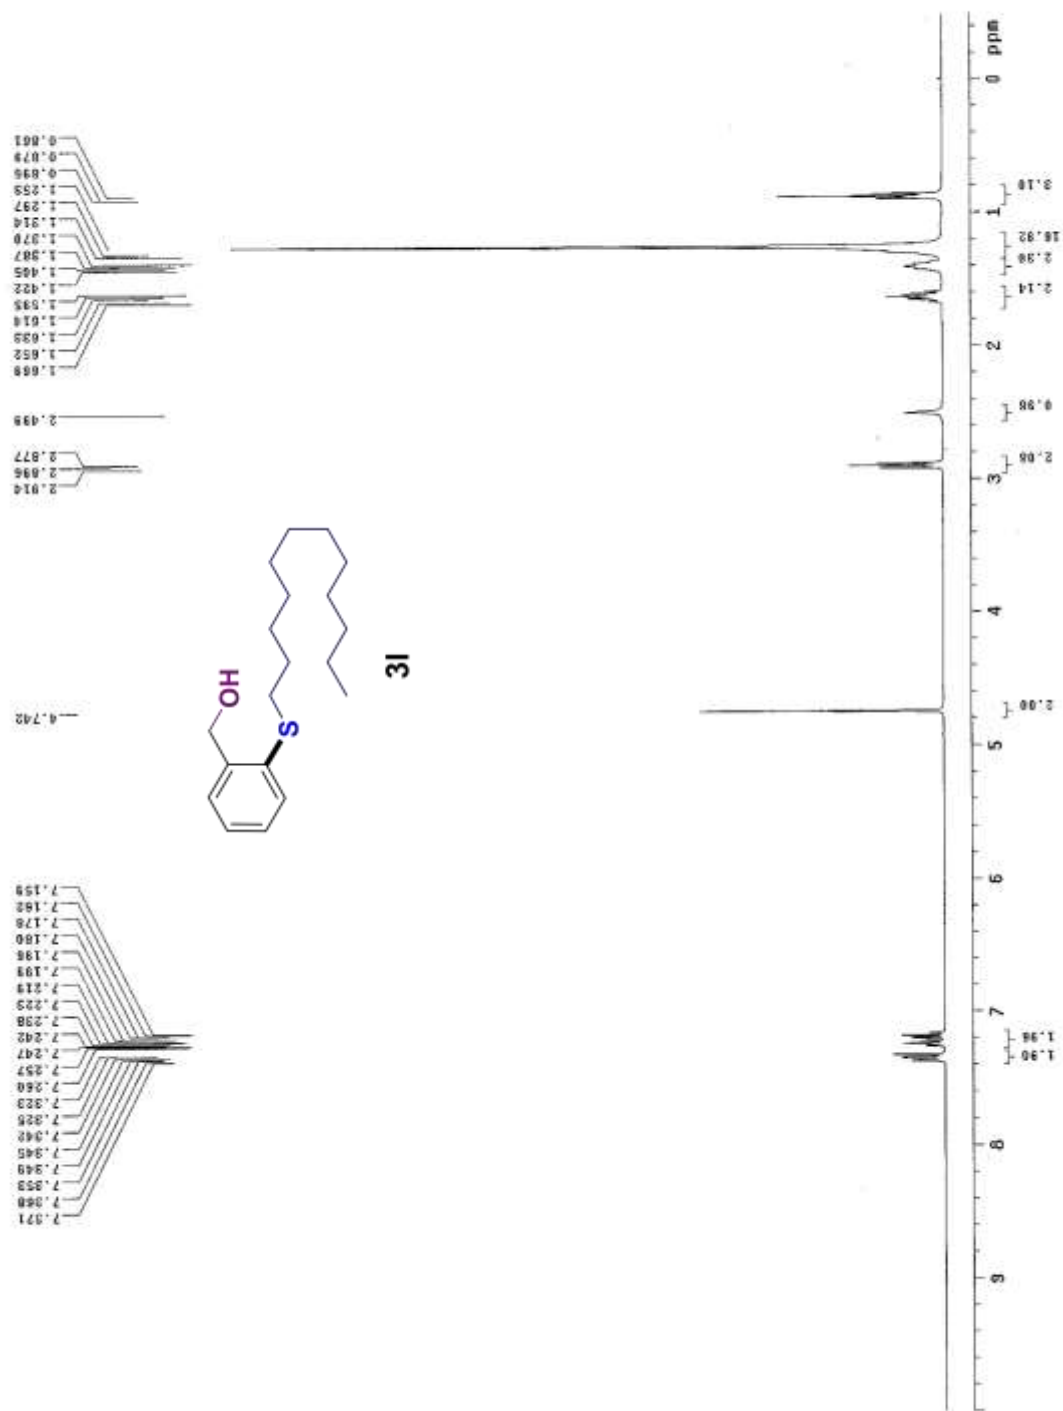

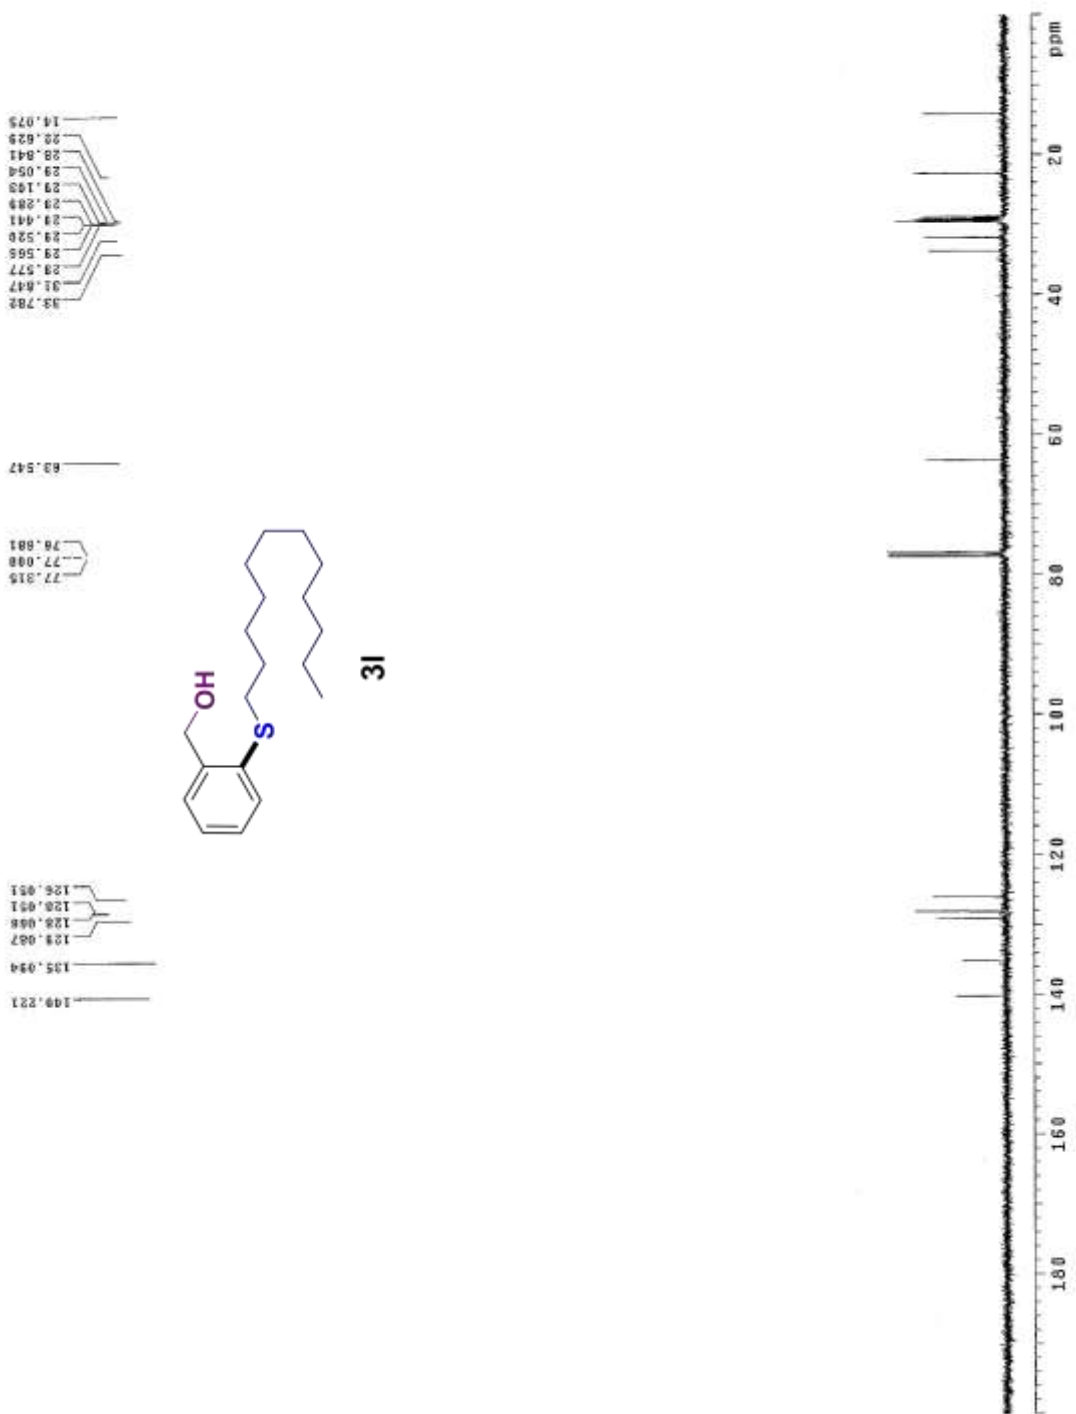

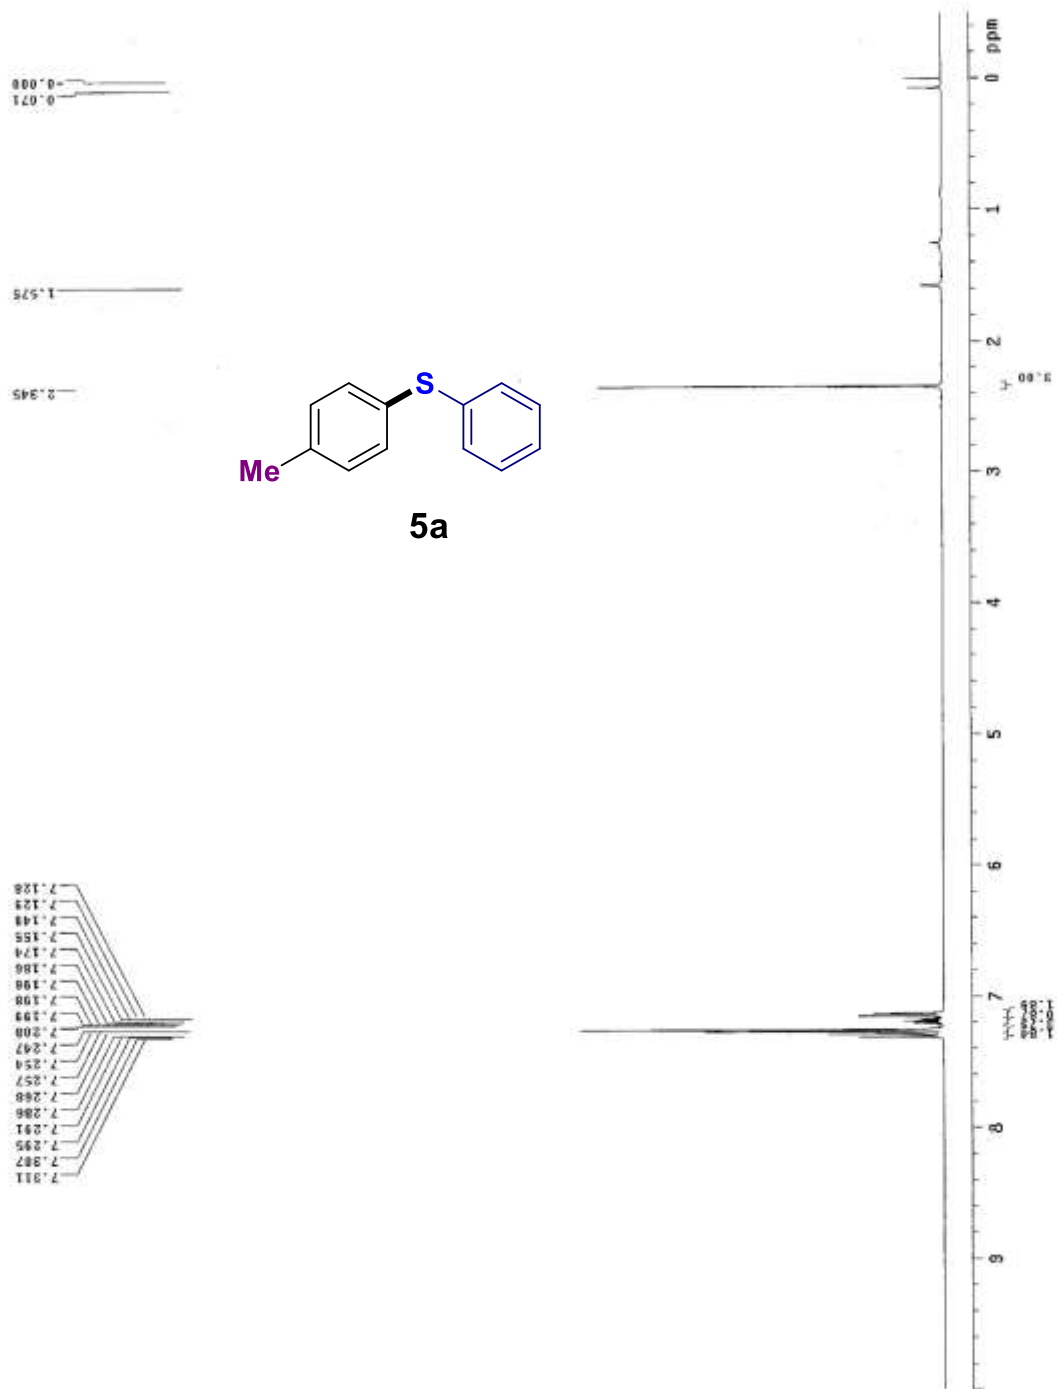

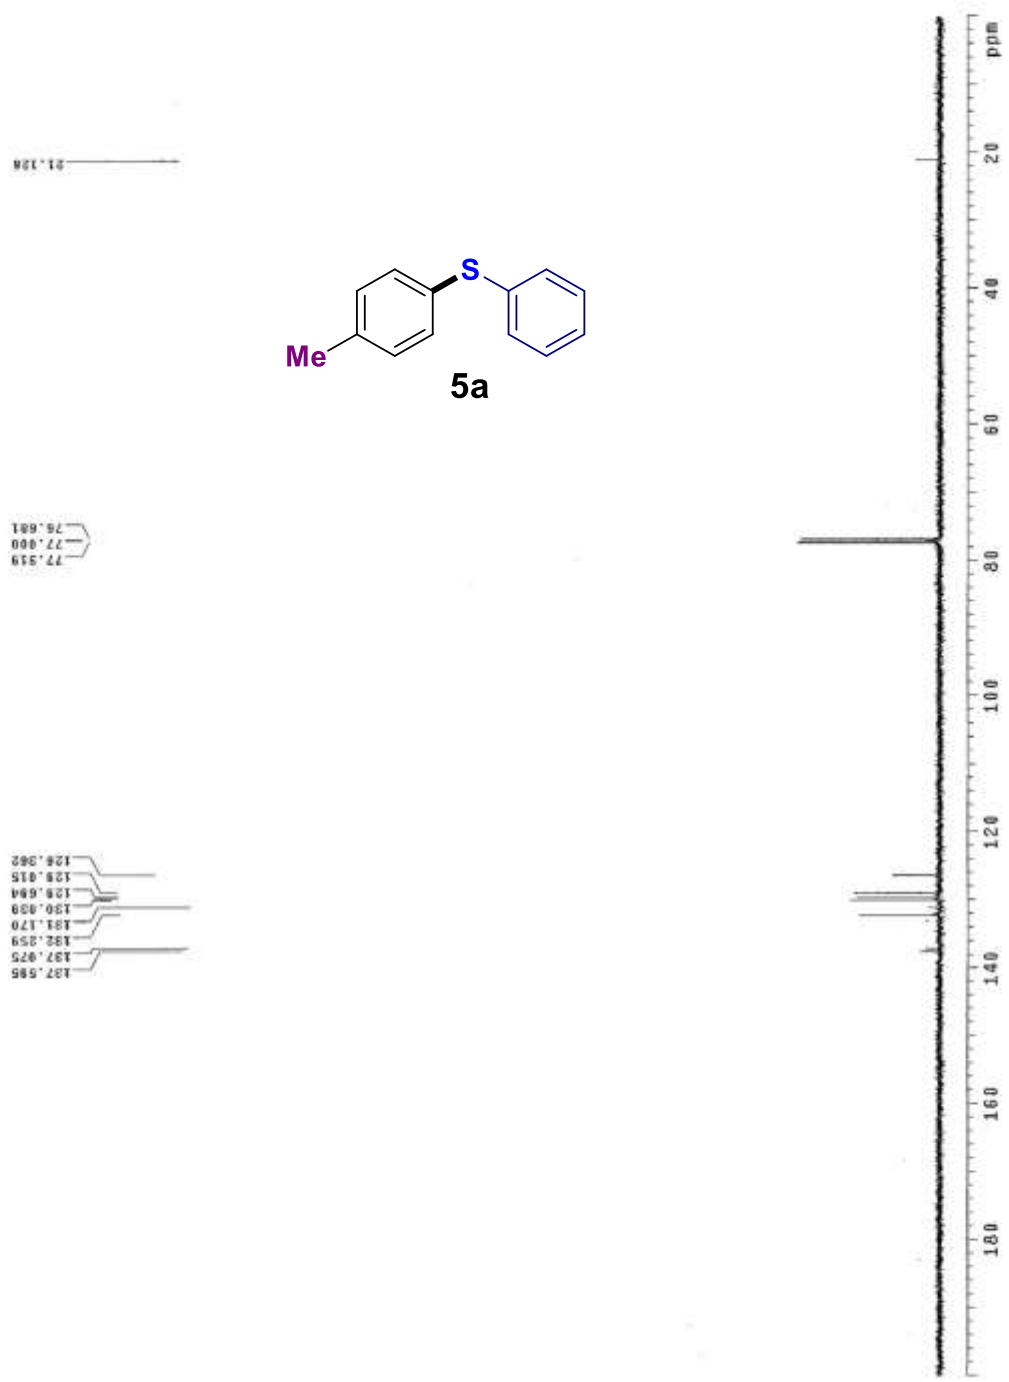

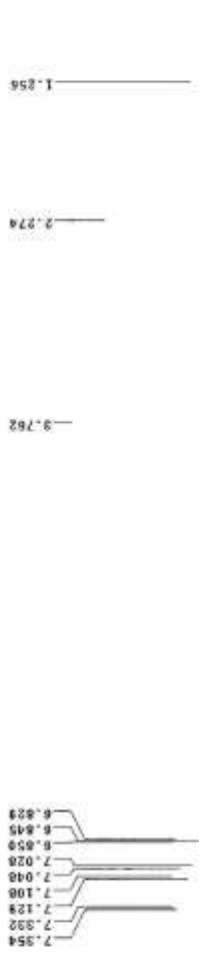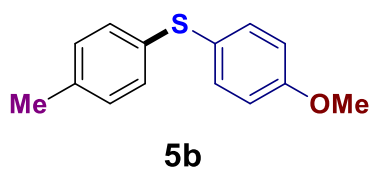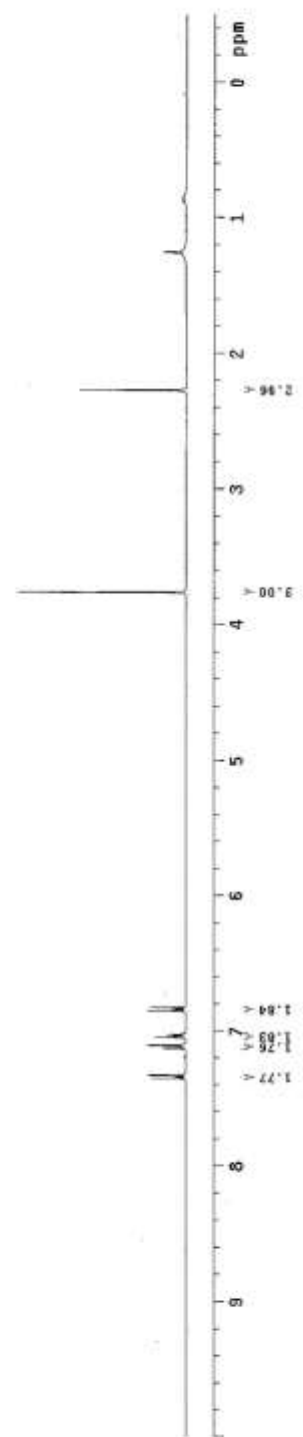

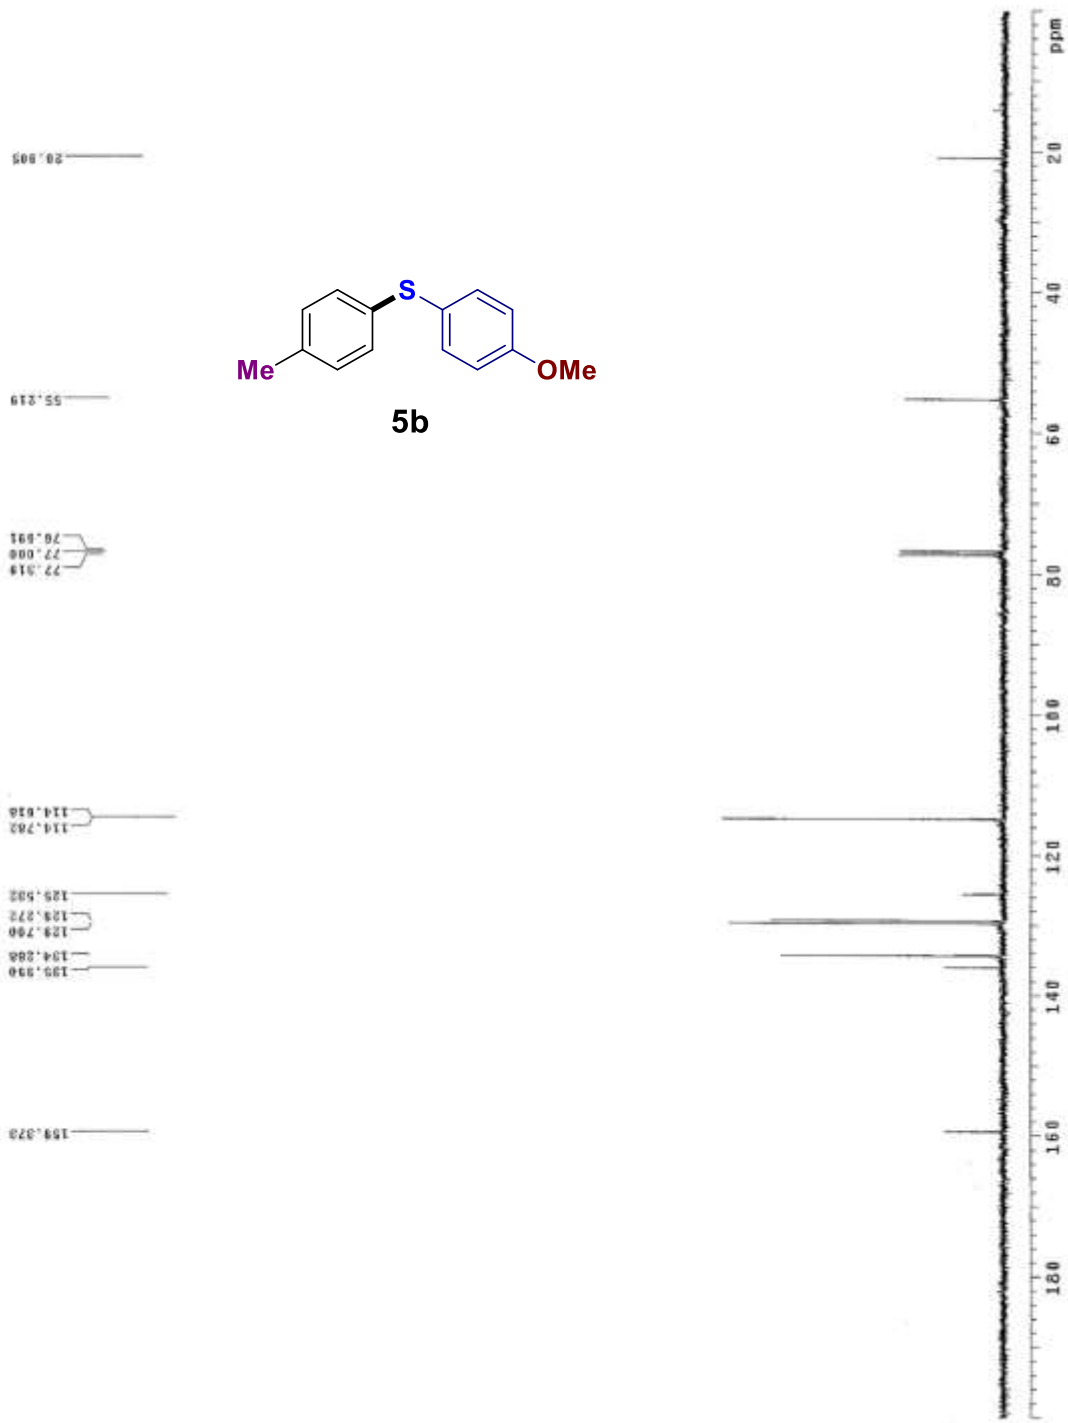



0.002

1.547

2.378

7.302  
7.286  
7.267  
7.265  
7.257  
7.251  
7.248  
7.241  
7.232  
7.208  
7.190  
7.159  
7.158  
7.156  
7.155  
7.146  
7.139  
7.137

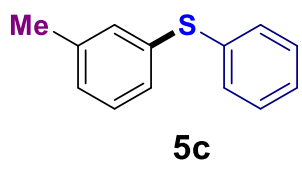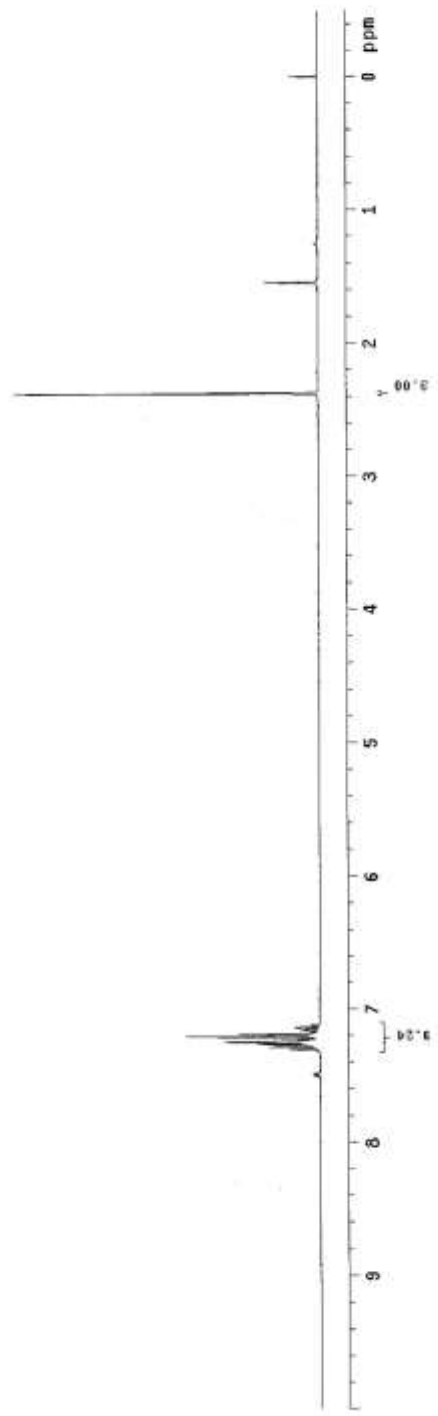

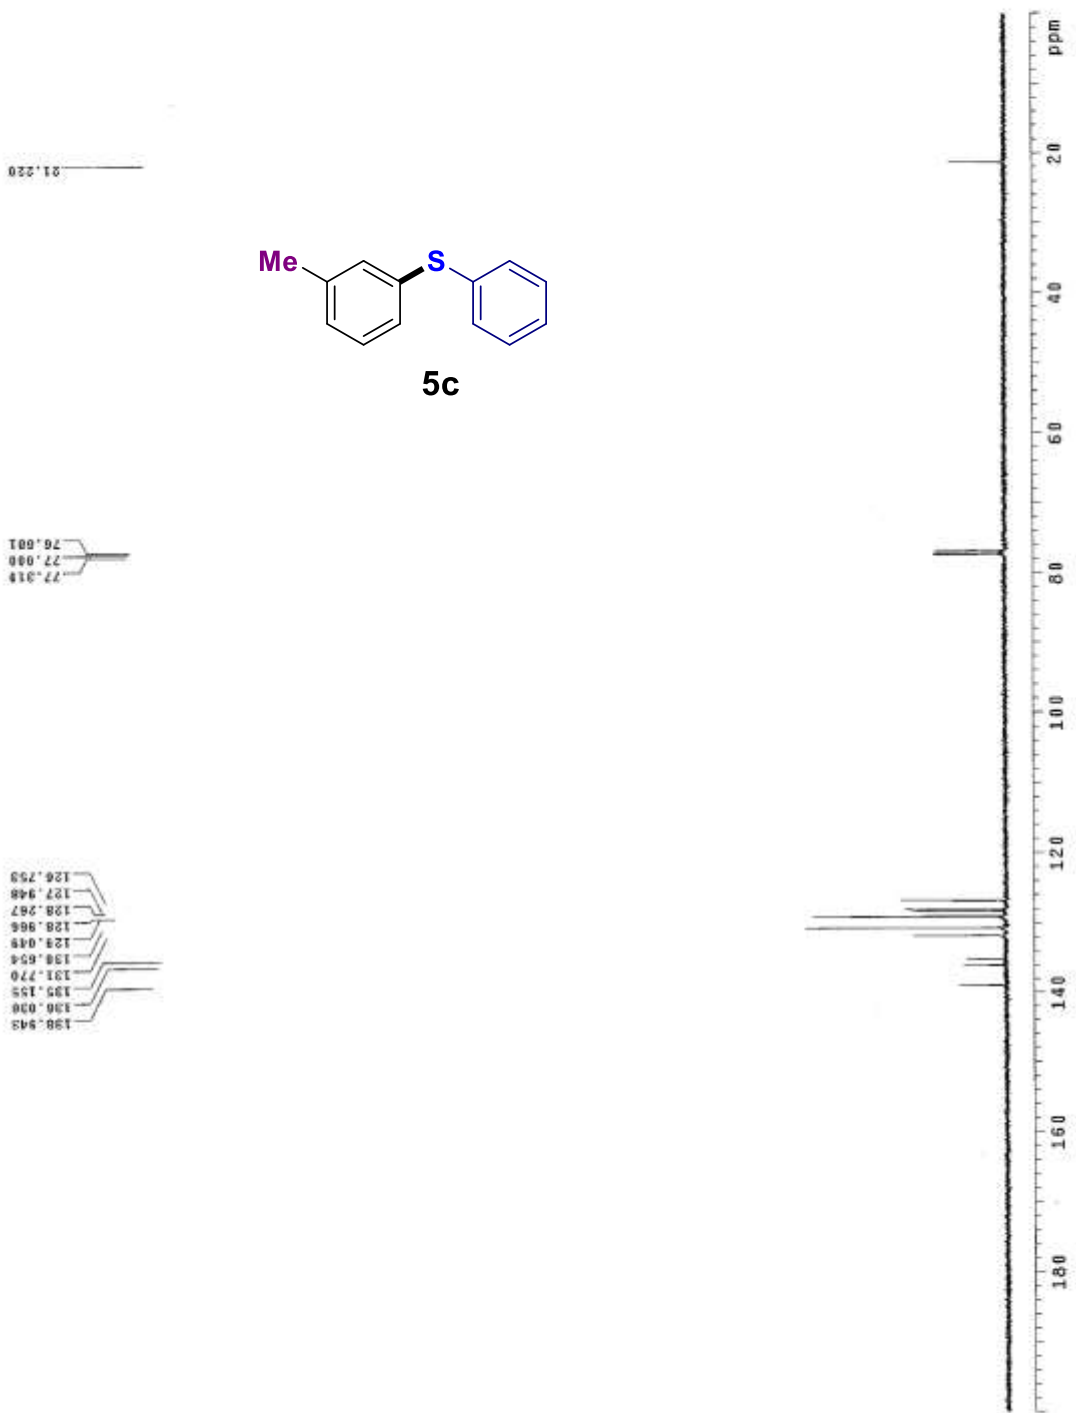

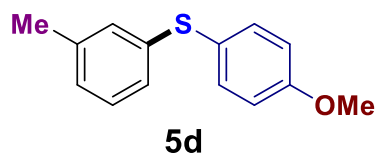

7.288

3.805

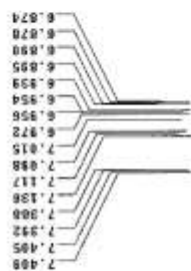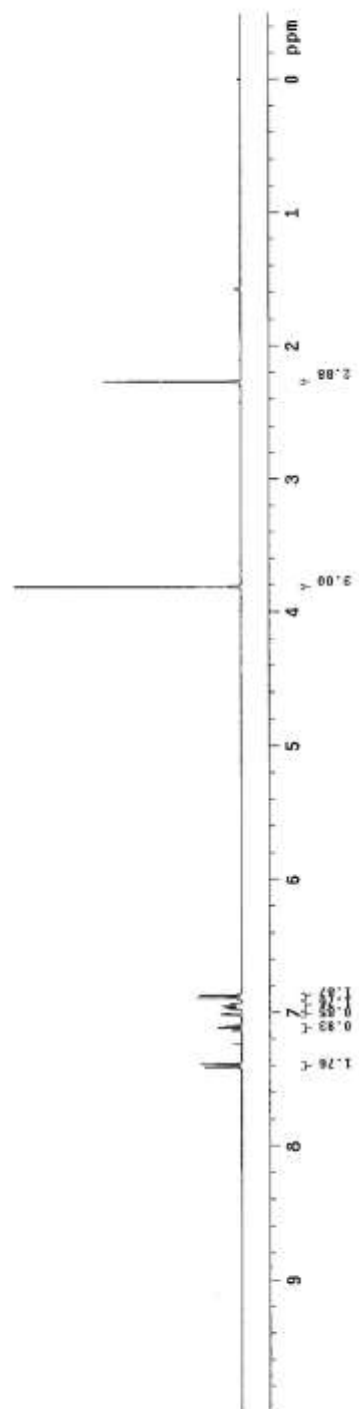

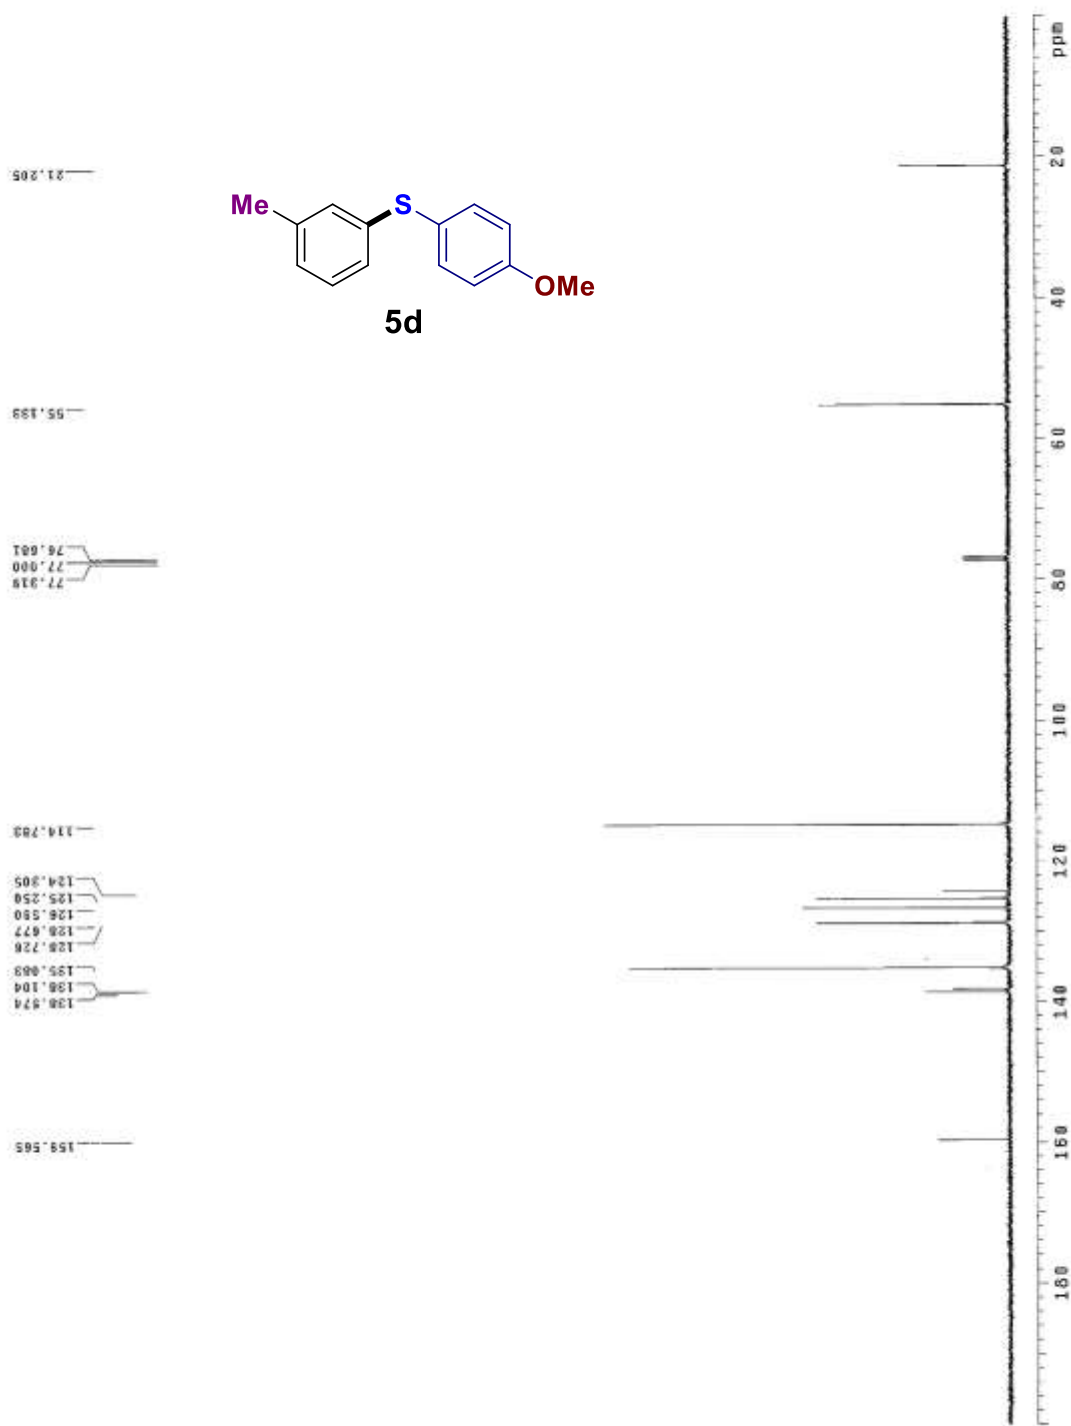

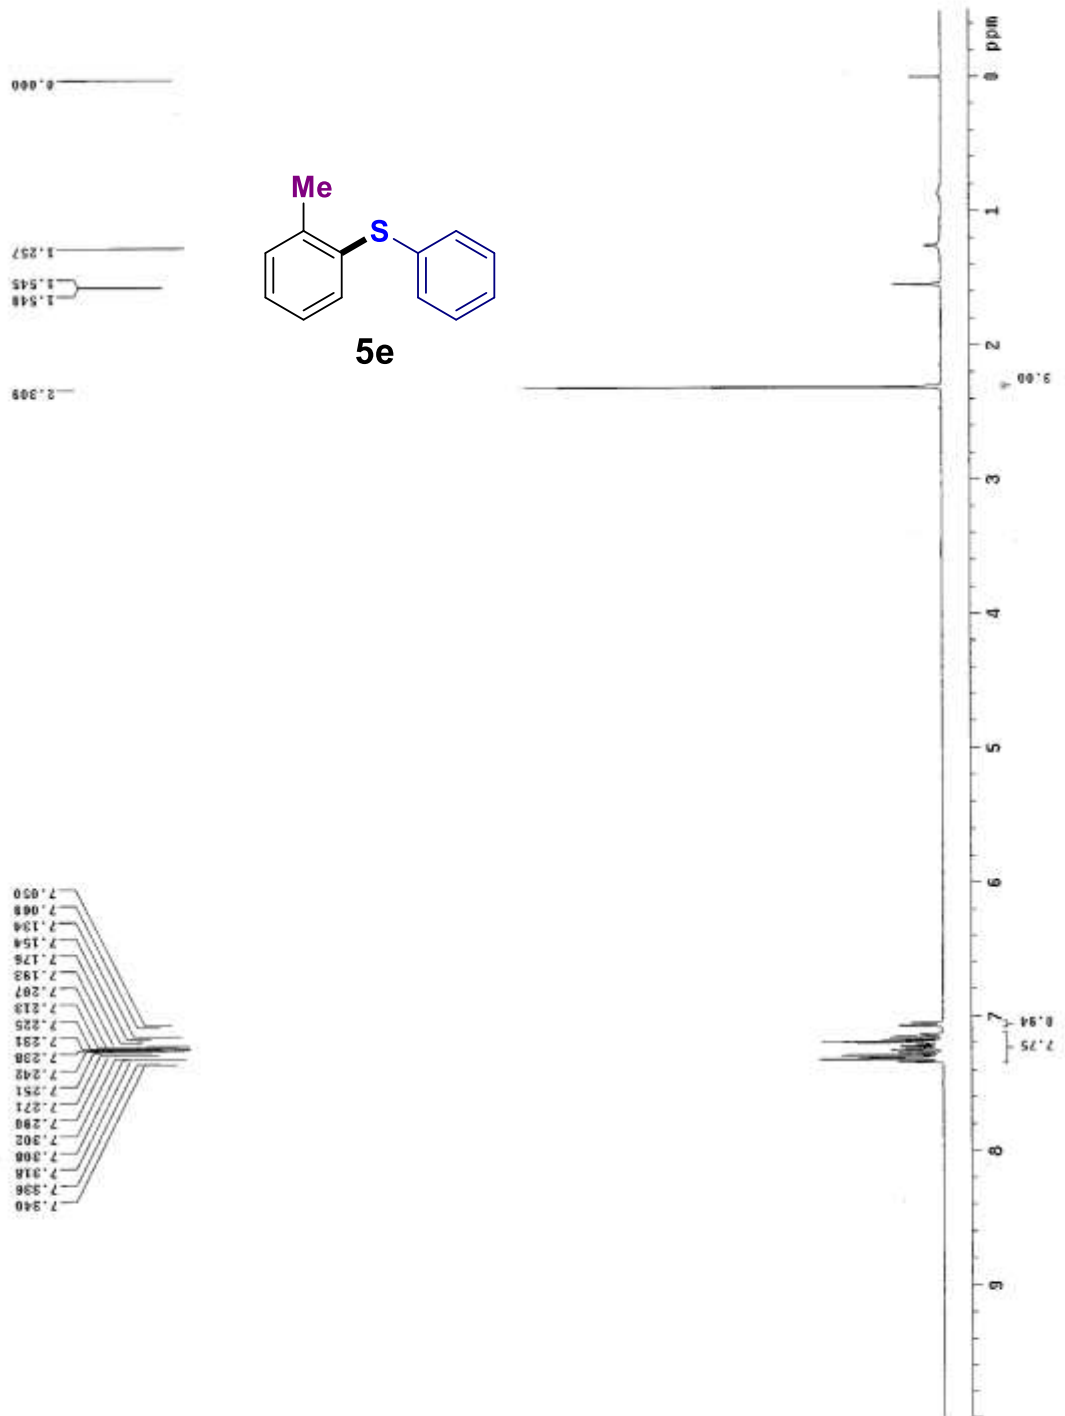

77.005

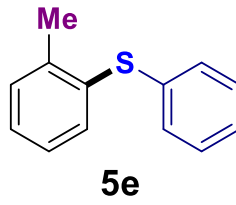

77.919  
77.000  
76.881

138.908  
138.013  
135.125  
131.747  
130.610  
129.880  
128.954  
128.244  
127.933  
127.299  
127.019  
126.738

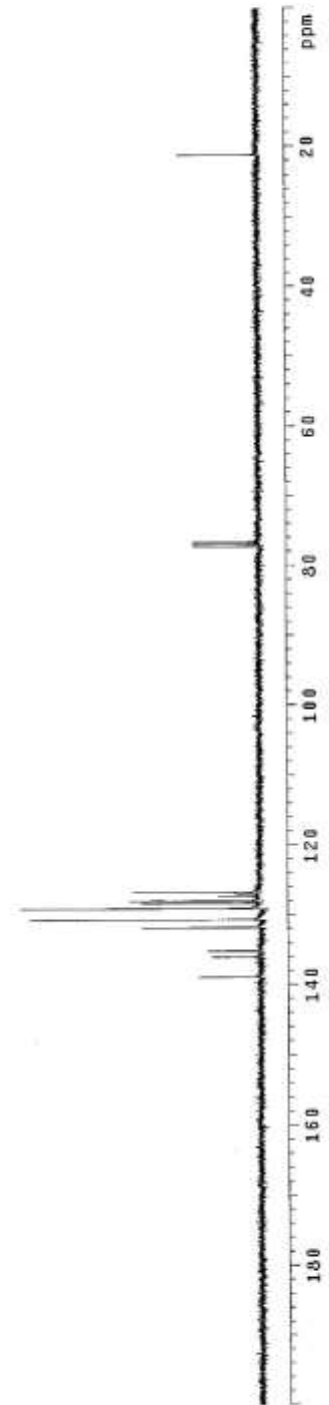



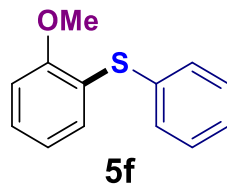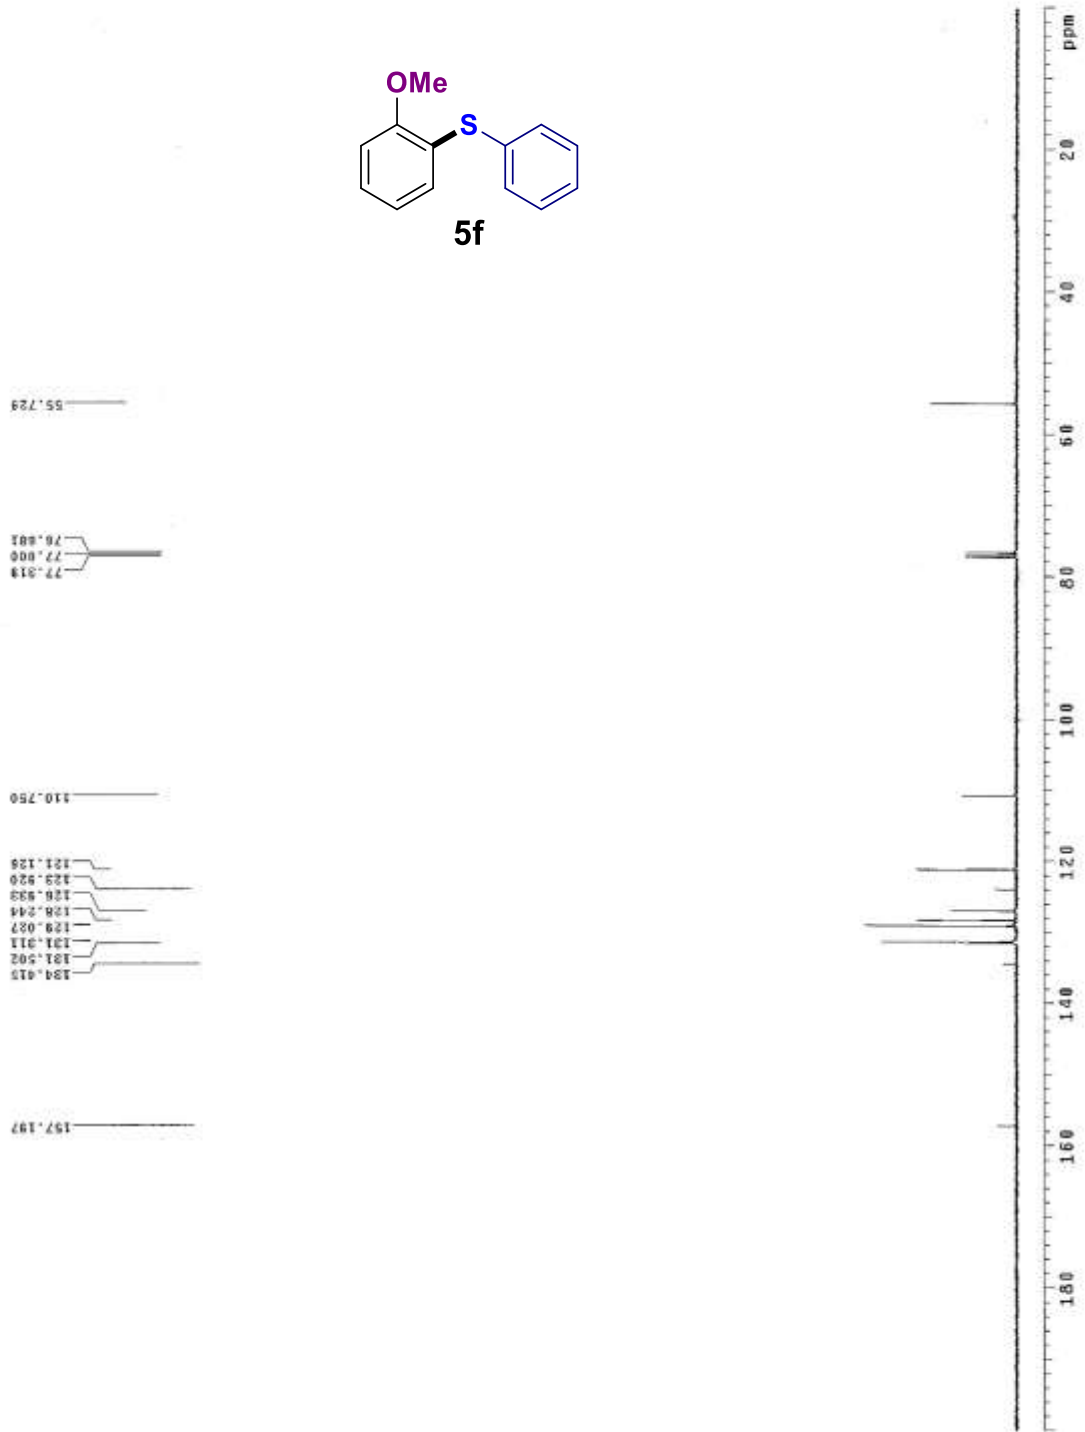



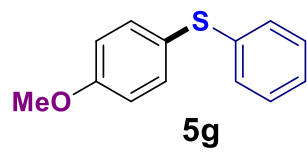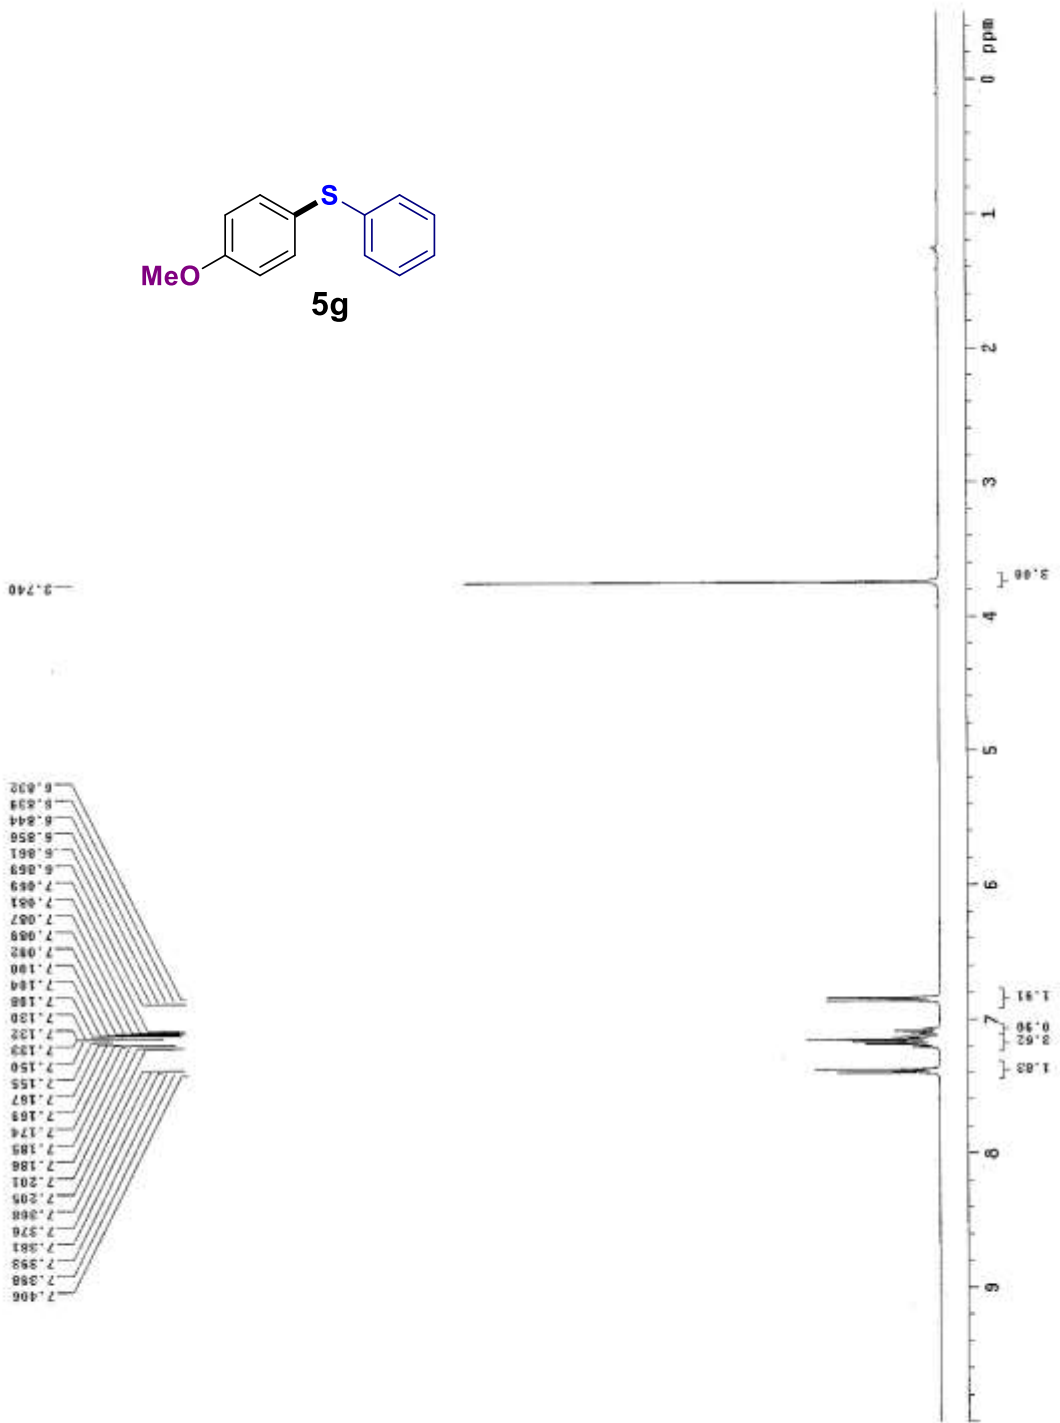

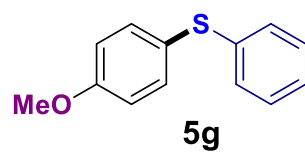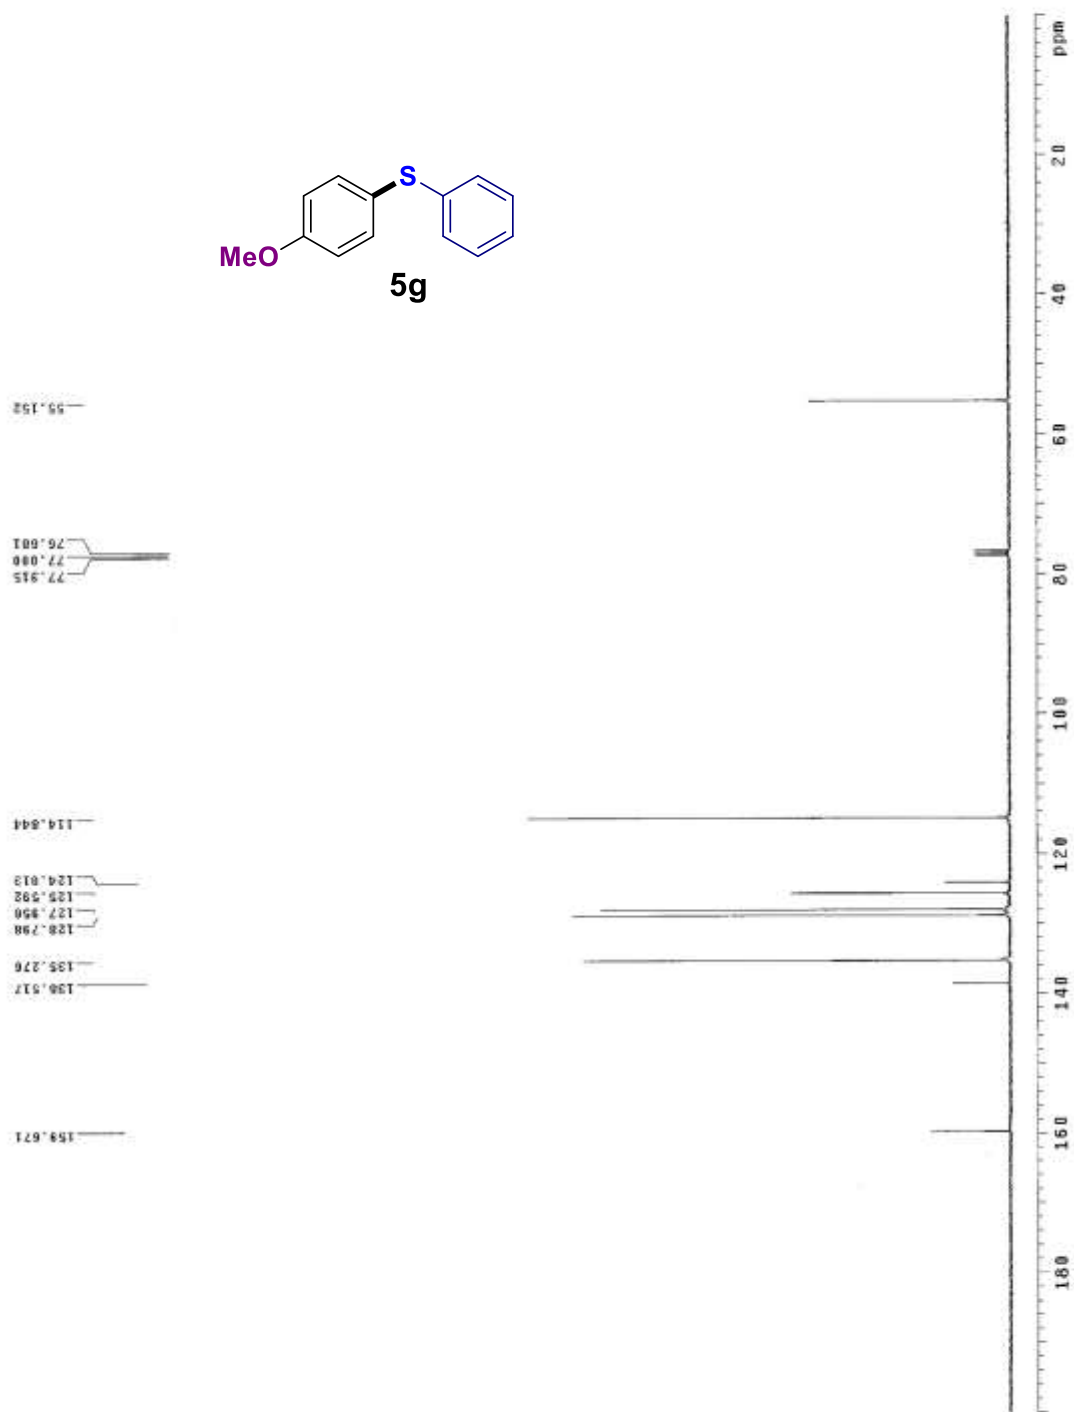

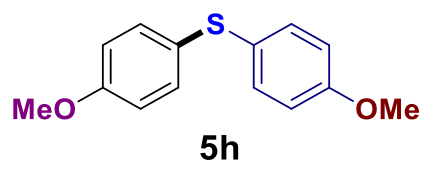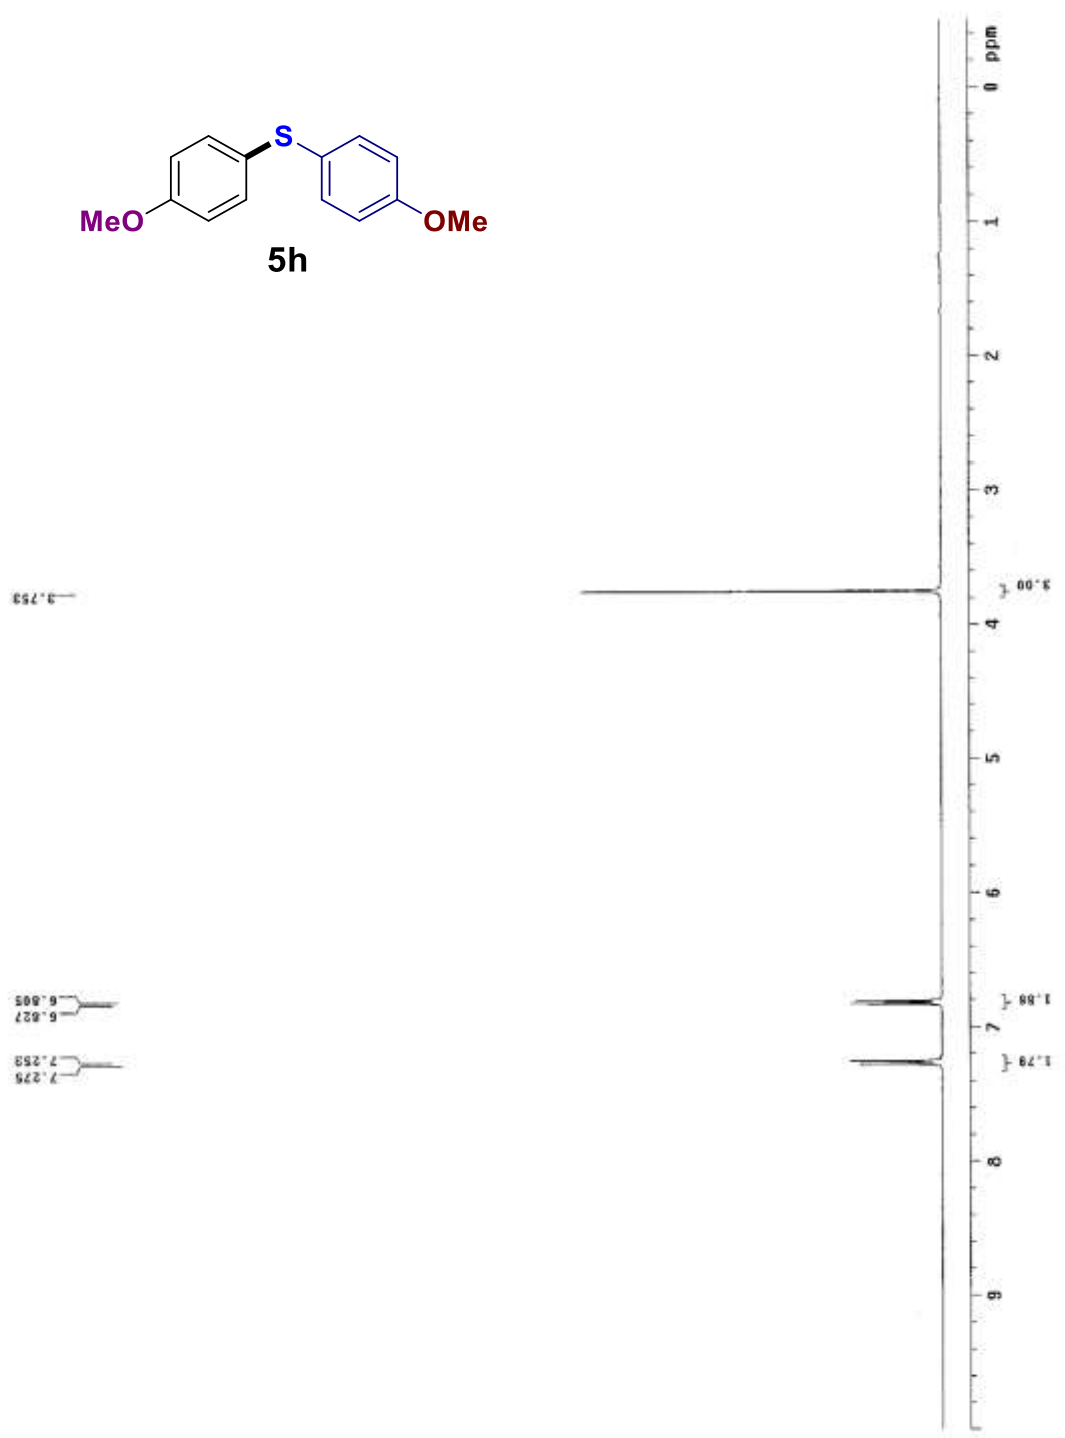

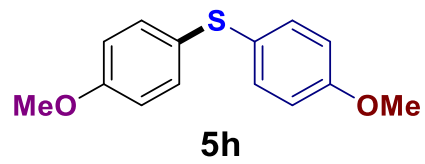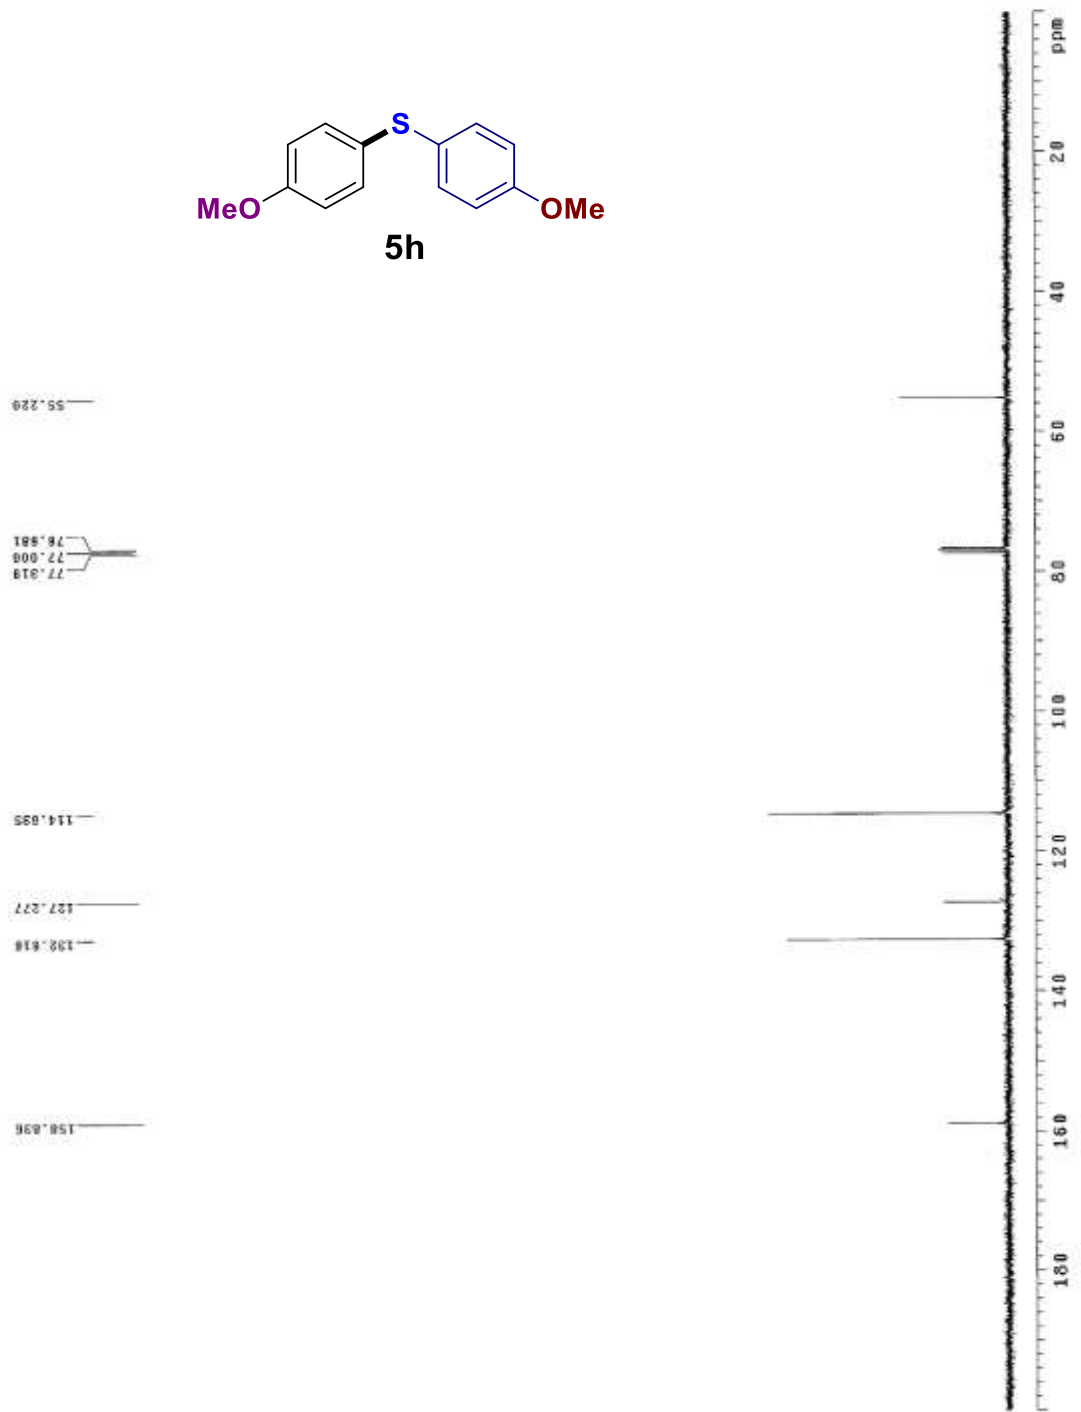

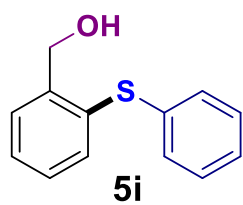

7.498

4.682

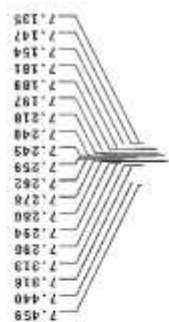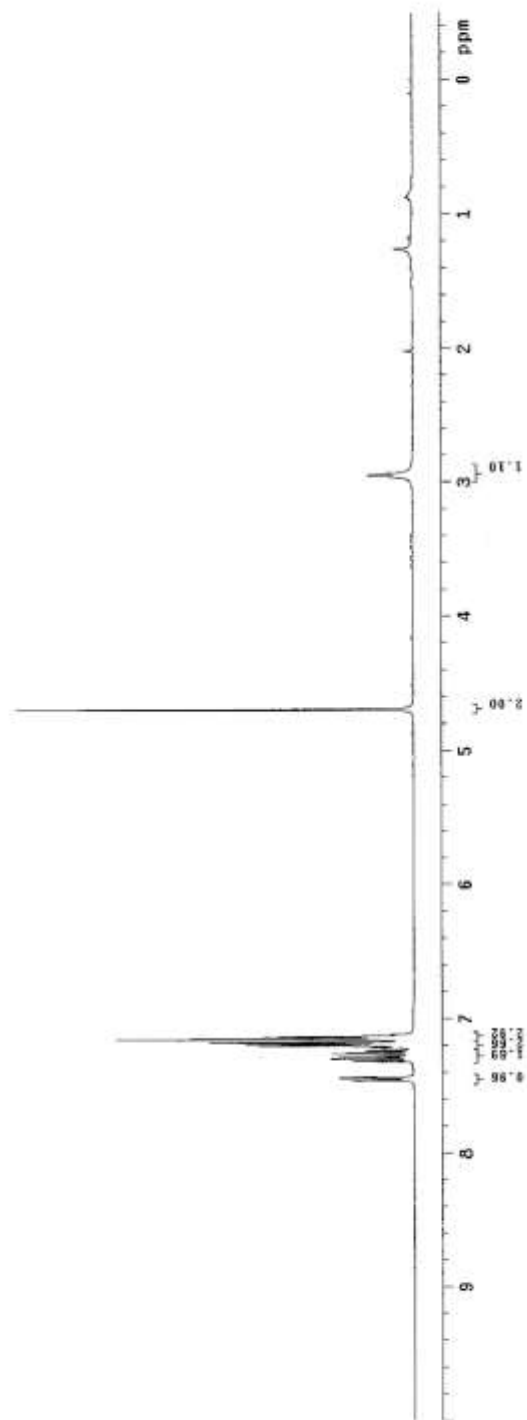

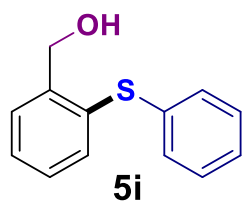

72.1566

77.3135  
77.0000  
76.8855

142.176  
135.000  
133.578  
132.428  
131.428  
129.232  
129.045  
128.225  
128.130  
128.058  
128.028

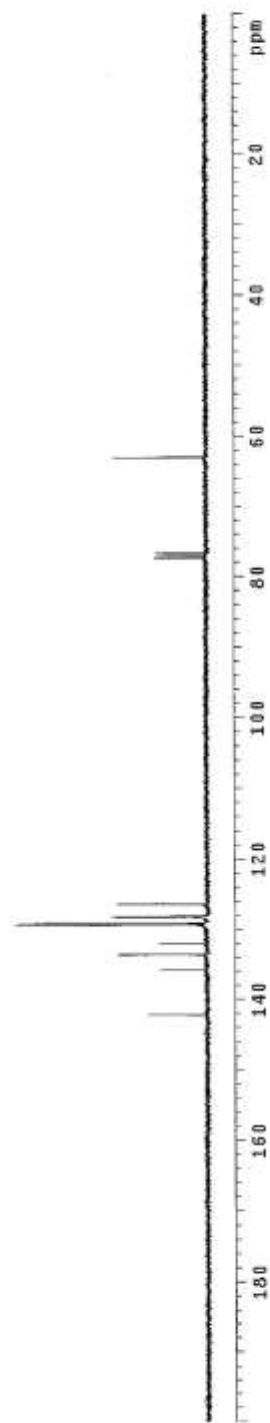



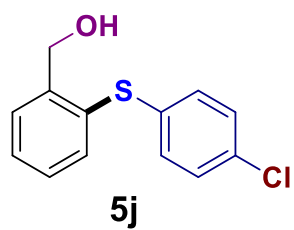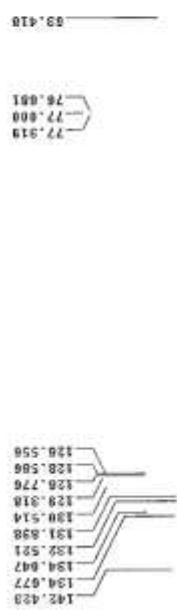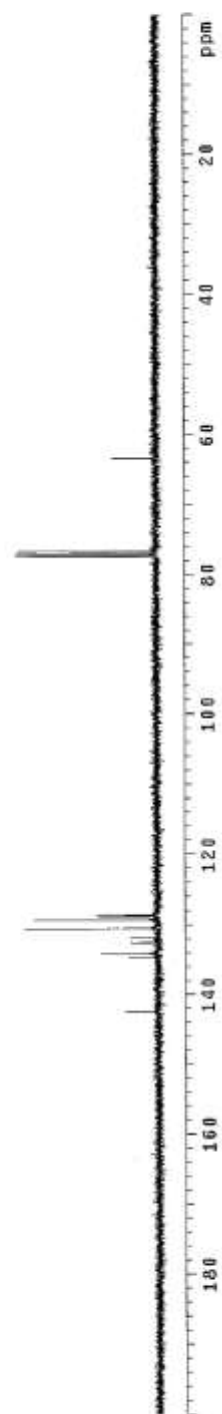



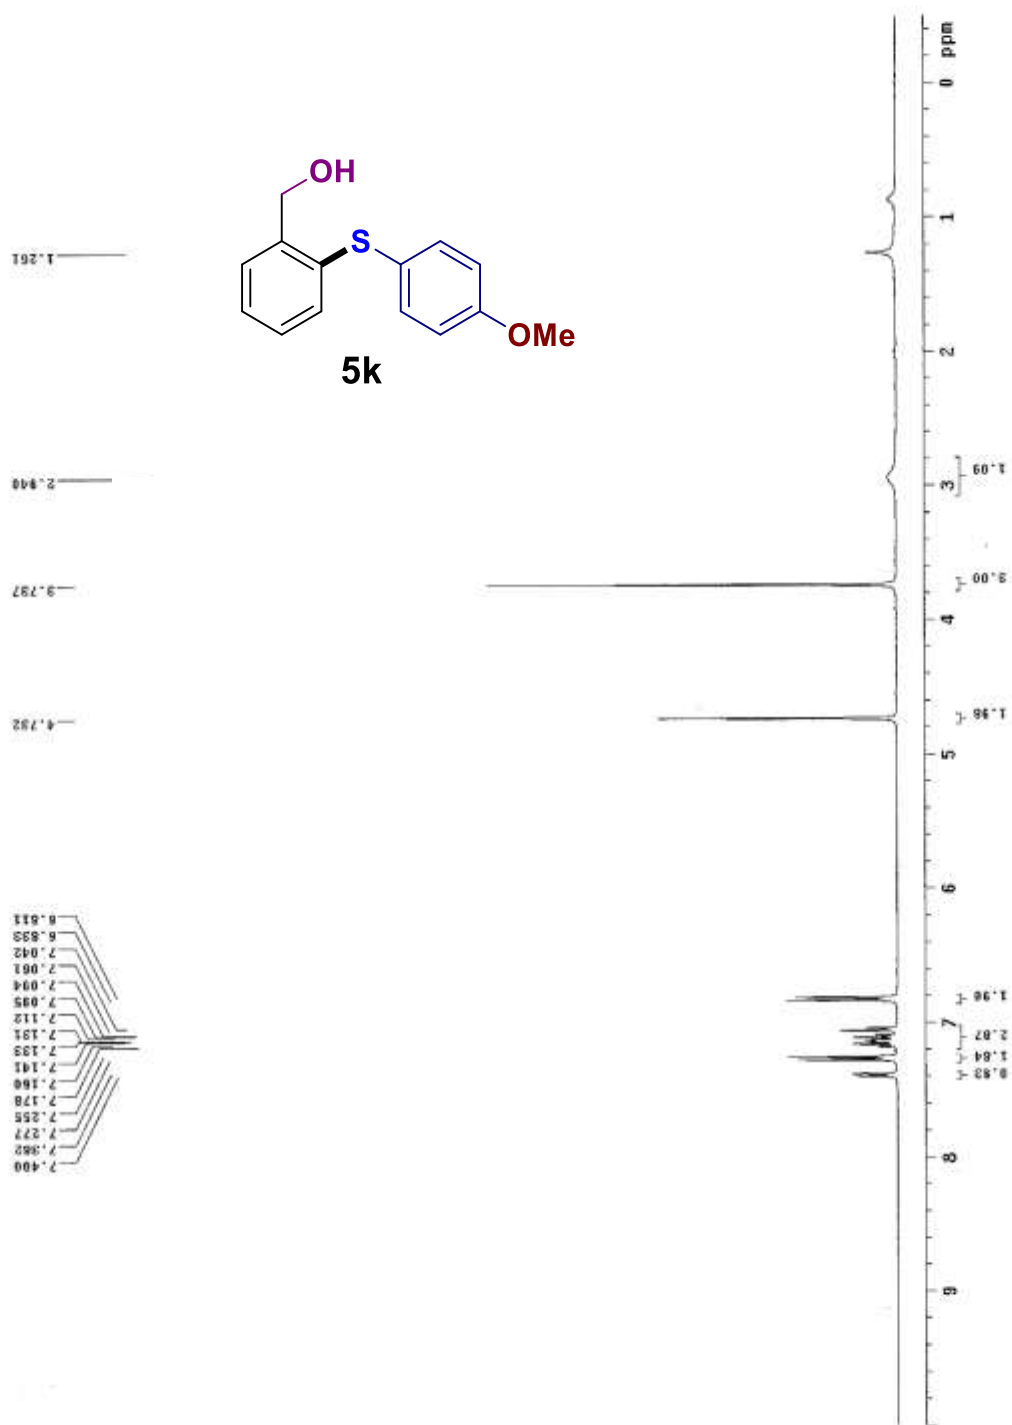

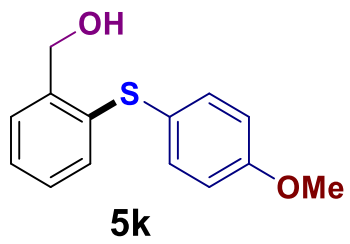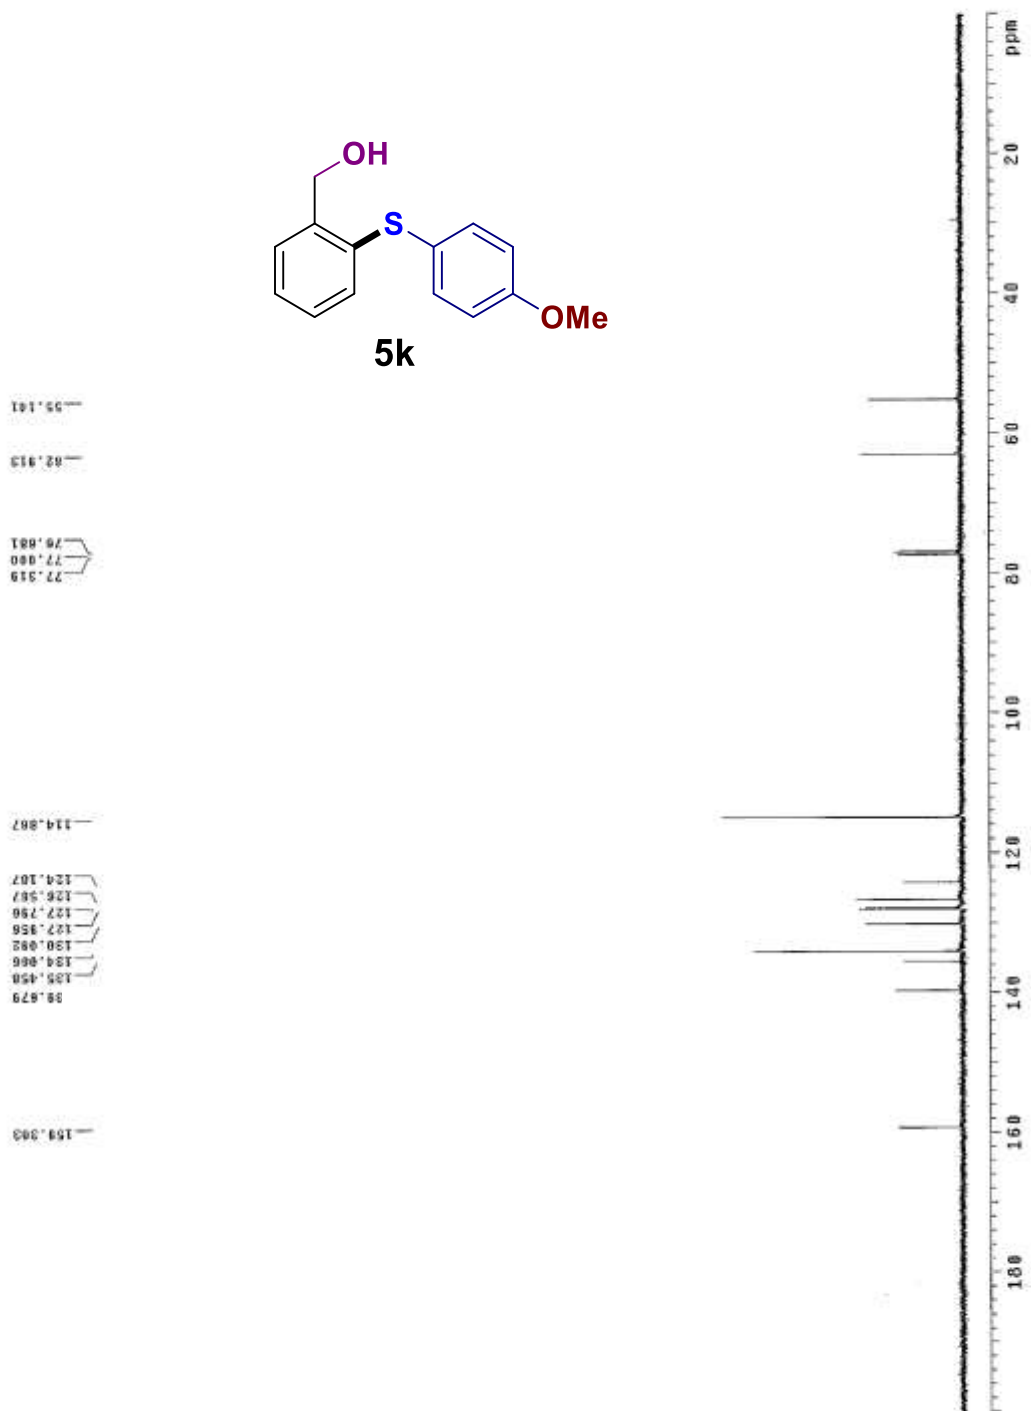

Supplement: d4cy00968a1.pdf [file d4cy00968a1.pdf]
